# Supplementary material for: Systematic analysis of NDUFAF6 in complex I assembly and mitochondrial disease
Source: Research Square preprint supplement (doi:10.21203/rs.3.rs-3332602/v1), 2023-11-16
Supplement: Supplementary file 1 [file 34d8fa0fcc779796238e5d0e.xlsx]

## Sheet: Table of Contents
Supplemental Tables
S1	DMS fitness scores
S2	Additional NDUFAF6 annotations for DMS analysis
S3	XL-MS hits

## Sheet: S1
Reference AA	Position	Variant AA	Fitness	Error Estimate	DMS Phenotype
45	S	N	-0.157877	0.0517247	benign
45	S	C	-0.0884557	0.0623127	benign
45	S	*	-1.27218	0.108602	pathogenic
45	S	Y	-0.0106276	0.0584443	benign
45	S	V	-0.764939	0.0930556	pathogenic
45	S	G	-0.170255	0.0585471	benign
45	S	A	-0.225903	0.0825469	benign
45	S	E	-0.353665	0.0802721	benign
45	S	D	-0.649787	0.079452	pathogenic
45	S	L	-0.313052	0.0825627	benign
45	S	P	-0.136823	0.0901939	benign
45	S	Q	0.144961	0.0593223	benign
45	S	H	0.206153	0.0607759	benign
45	S	M	-0.0249728	0.0693088	benign
45	S	I	-0.376531	0.0512597	benign
45	S	W	-0.0991983	0.0629035	benign
45	S	F	-0.0210408	0.0588685	benign
45	S	K	-0.661747	0.0836281	pathogenic
45	S	T	0.0413317	0.0583275	benign
45	S	R	-0.396489	0.0418864	benign
46	V	N	-0.379183	0.0767466	benign
46	V	*	-1.34769	0.118079	pathogenic
46	V	C	0.0251694	0.0737512	benign
46	V	W	-0.283566	0.0668589	benign
46	V	F	0.168516	0.0841636	benign
46	V	L	0.062648	0.043737	benign
46	V	P	-0.579548	0.0608087	benign
46	V	Q	-0.513345	0.0457309	benign
46	V	M	-0.130873	0.0441677	benign
46	V	I	0.213482	0.0655606	benign
46	V	S	-0.323522	0.0649452	benign
46	V	R	-0.0119582	0.0569587	benign
46	V	T	-0.410831	0.0861106	benign
46	V	K	-0.393689	0.0744381	benign
46	V	Y	0.141003	0.0697885	benign
46	V	H	-0.0919534	0.0535435	benign
46	V	A	-0.120046	0.0861194	benign
46	V	G	-0.670947	0.0857057	pathogenic
46	V	D	-0.653852	0.0996636	pathogenic
46	V	E	-0.487949	0.0626153	benign
47	A	D	-0.794351	0.0932314	pathogenic
47	A	N	-0.310857	0.0568716	benign
47	A	K	-0.472269	0.0597281	benign
47	A	T	0.0366275	0.0553507	benign
47	A	R	0.143691	0.0510134	benign
47	A	S	0.170638	0.0569279	benign
47	A	I	-0.18285	0.0563152	benign
47	A	M	0.0968624	0.0582439	benign
47	A	H	0.172547	0.0582779	benign
47	A	Q	-0.144435	0.0611391	benign
47	A	P	-0.689222	0.0818467	pathogenic
47	A	L	-0.73846	0.0916788	pathogenic
47	A	V	-0.00338782	0.162597	benign
47	A	E	-0.876011	0.083393	pathogenic
47	A	F	0.0242465	0.0615008	benign
47	A	W	0.0477035	0.0600701	benign
47	A	C	0.120122	0.0601914	benign
47	A	*	-1.35038	0.112905	pathogenic
47	A	Y	0.0978025	0.0579204	benign
47	A	G	-0.34633	0.067622	benign
48	A	G	0.0123425	0.0701283	benign
48	A	V	-0.141484	0.0411235	benign
48	A	F	0.12173	0.0548188	benign
48	A	C	0.0601174	0.0562265	benign
48	A	Y	0.0587408	0.0587542	benign
48	A	*	-1.31922	0.102109	pathogenic
48	A	W	0.116004	0.054594	benign
48	A	R	0.0851527	0.0570441	benign
48	A	M	0.0770416	0.0558382	benign
48	A	I	0.189312	0.0641664	benign
48	A	S	0.133522	0.0556772	benign
48	A	P	-0.382538	0.113323	benign
48	A	T	0.307202	0.0562281	benign
48	A	L	0.124357	0.0598656	benign
48	A	D	-0.111363	0.0642969	benign
48	A	E	-0.328242	0.0405051	benign
48	A	Q	0.153653	0.0613962	benign
48	A	K	-0.0133016	0.0599332	benign
48	A	H	0.174798	0.0613273	benign
48	A	N	0.194138	0.0533454	benign
49	A	M	-0.0576835	0.0788984	benign
49	A	F	0.122139	0.0584794	benign
49	A	W	0.102752	0.0615896	benign
49	A	C	0.132857	0.0765268	benign
49	A	*	-1.25762	0.111554	pathogenic
49	A	Y	0.0963344	0.0599043	benign
49	A	H	0.104968	0.0622512	benign
49	A	G	-0.613881	0.0531612	pathogenic
49	A	E	-0.317593	0.063548	benign
49	A	V	0.0739752	0.0702604	benign
49	A	L	0.205559	0.0624287	benign
49	A	N	-0.046178	0.0621803	benign
49	A	P	-0.281562	0.0816217	benign
49	A	T	-0.0349961	0.0537072	benign
49	A	R	0.125705	0.0641896	benign
49	A	S	0.100445	0.063787	benign
49	A	Q	0.0603062	0.0655019	benign
49	A	I	0.151678	0.0573933	benign
49	A	D	-0.372463	0.0415679	benign
49	A	K	0.160614	0.0582362	benign
50	S	N	-0.207427	0.056629	benign
50	S	K	-0.301141	0.0648358	benign
50	S	T	0.114777	0.0623947	benign
50	S	R	-0.217868	0.0403564	benign
50	S	P	0.000302113	0.0672261	benign
50	S	E	-0.740404	0.079279	pathogenic
50	S	F	-0.218428	0.0568099	benign
50	S	W	-0.363032	0.0716479	benign
50	S	C	-0.0211635	0.0504232	benign
50	S	*	-1.34699	0.0994451	pathogenic
50	S	Y	0.0276556	0.055969	benign
50	S	V	-0.0721185	0.0591111	benign
50	S	G	-0.139698	0.0544569	benign
50	S	A	0.212569	0.0685018	benign
50	S	I	-0.251821	0.0413025	benign
50	S	D	-0.513184	0.0700343	benign
50	S	L	-0.403579	0.0680028	benign
50	S	M	-0.157762	0.0667717	benign
50	S	Q	-0.339967	0.0764692	benign
50	S	H	0.0543577	0.0618042	benign
51	G	T	0.105457	0.0694745	benign
51	G	N	0.013761	0.0632032	benign
51	G	K	-0.137846	0.0592732	benign
51	G	Y	0.0470624	0.0650644	benign
51	G	S	0.0751039	0.0827939	benign
51	G	W	-0.133016	0.0629612	benign
51	G	F	-0.159845	0.0618364	benign
51	G	*	-0.451669	0.041574	benign
51	G	V	-0.181366	0.0563198	benign
51	G	R	-0.139624	0.0428748	benign
51	G	I	-0.246248	0.0648706	benign
51	G	C	0.037975	0.0715371	benign
51	G	L	-0.0683935	0.0746374	benign
51	G	D	0.0157974	0.0709418	benign
51	G	E	-0.338525	0.0648008	benign
51	G	A	0.0168601	0.0760113	benign
51	G	P	-0.252755	0.0902708	benign
51	G	Q	-0.035072	0.0866707	benign
51	G	H	0.0435584	0.0884415	benign
51	G	M	-0.169592	0.0773849	benign
52	P	R	0.0919934	0.0623847	benign
52	P	I	0.0530049	0.0556148	benign
52	P	K	-0.0490195	0.0694945	benign
52	P	N	-0.029481	0.0545955	benign
52	P	H	0.00543199	0.0580609	benign
52	P	Q	-0.205907	0.0351149	benign
52	P	S	0.0378842	0.0701437	benign
52	P	T	0.0363665	0.0605833	benign
52	P	M	-0.101016	0.0666852	benign
52	P	V	0.00460281	0.0703412	benign
52	P	A	0.0360807	0.0631214	benign
52	P	E	-0.0210862	0.0634245	benign
52	P	D	-0.08095	0.0623323	benign
52	P	L	-0.203965	0.0435806	benign
52	P	Y	0.049516	0.0606718	benign
52	P	*	-1.41908	0.121168	pathogenic
52	P	C	-0.0481989	0.0586989	benign
52	P	W	-0.000884099	0.0707098	benign
52	P	F	-0.0351296	0.0617187	benign
52	P	G	-0.0614861	0.0625903	benign
53	G	N	-0.0494638	0.0603004	benign
53	G	K	0.0685532	0.0613079	benign
53	G	Y	0.0265517	0.0569996	benign
53	G	S	-0.192112	0.0508619	benign
53	G	I	0.052522	0.0587728	benign
53	G	*	-1.35804	0.105101	pathogenic
53	G	H	-0.0603348	0.0668252	benign
53	G	Q	-0.147503	0.0827158	benign
53	G	P	0.148906	0.105684	benign
53	G	L	0.0253806	0.0868802	benign
53	G	D	-0.20356	0.0537921	benign
53	G	E	-0.179859	0.0587614	benign
53	G	A	-0.155918	0.0894948	benign
53	G	R	0.0448307	0.0586483	benign
53	G	T	-0.0808565	0.0649952	benign
53	G	M	0.00535761	0.055341	benign
53	G	W	-0.0171674	0.0647473	benign
53	G	C	-0.265477	0.040993	benign
53	G	F	0.052792	0.0626748	benign
53	G	V	0.0308604	0.0660748	benign
54	A	N	0.0763564	0.0771482	benign
54	A	K	-0.168271	0.0819225	benign
54	A	T	-0.207206	0.0534799	benign
54	A	R	0.00399009	0.066235	benign
54	A	S	0.0191987	0.088603	benign
54	A	M	-0.220385	0.0696135	benign
54	A	Q	0.000126984	0.0703478	benign
54	A	P	0.000939842	0.0669375	benign
54	A	L	-0.0400953	0.0765123	benign
54	A	D	-0.239185	0.046904	benign
54	A	E	-0.266612	0.0818619	benign
54	A	H	-0.00359356	0.0743491	benign
54	A	F	0.0826588	0.0714521	benign
54	A	I	0.0164523	0.0742243	benign
54	A	C	0.0210563	0.0825168	benign
54	A	*	-1.18695	0.124921	pathogenic
54	A	Y	0.101066	0.0696367	benign
54	A	V	-0.192508	0.0837761	benign
54	A	G	-0.139734	0.0764169	benign
54	A	W	-0.109573	0.0748287	benign
55	W	M	0.125838	0.0621929	benign
55	W	H	0.211322	0.0733943	benign
55	W	Q	0.0512014	0.0711416	benign
55	W	P	0.145553	0.131398	benign
55	W	E	0.0025399	0.0745304	benign
55	W	D	0.218859	0.0978487	benign
55	W	I	0.143204	0.0583706	benign
55	W	A	-0.119849	0.136345	benign
55	W	G	0.251442	0.273286	benign
55	W	V	0.000734797	0.0724677	benign
55	W	L	0.01187	0.0654002	benign
55	W	S	0.163211	0.0770978	benign
55	W	K	0.0273837	0.0629624	benign
55	W	T	0.164998	0.0782335	benign
55	W	N	0.0851795	0.0645215	benign
55	W	Y	0.0271957	0.0675924	benign
55	W	C	0.0533555	0.067176	benign
55	W	F	0.151848	0.0664068	benign
55	W	R	0.0723099	0.0618028	benign
55	W	*	-0.849547	0.0714513	pathogenic
56	G	V	0.288204	0.0990226	benign
56	G	Y	-0.0873062	0.0892777	benign
56	G	*	-1.1221	0.144423	pathogenic
56	G	C	-0.244377	0.0389019	benign
56	G	W	0.0307705	0.0919716	benign
56	G	F	-0.154771	0.0801074	benign
56	G	N	0.104799	0.085925	benign
56	G	K	0.20496	0.0761427	benign
56	G	R	0.270933	0.0808889	benign
56	G	A	0.0950743	0.0772305	benign
56	G	E	0.140285	0.0758564	benign
56	G	D	-0.186555	0.054896	benign
56	G	L	0.030111	0.0872917	benign
56	G	T	0.00168108	0.0864541	benign
56	G	P	0.114687	0.0922089	benign
56	G	Q	0.183552	0.147113	benign
56	G	H	0.0159306	0.0966328	benign
56	G	M	0.218152	0.0840024	benign
56	G	I	0.0960621	0.0871861	benign
56	G	S	-0.0605501	0.0571951	benign
57	T	W	-0.0695856	0.0684613	benign
57	T	C	0.00537216	0.0664479	benign
57	T	Y	0.0557908	0.0637981	benign
57	T	F	0.194982	0.0629106	benign
57	T	V	-0.129206	0.0628588	benign
57	T	G	0.0014094	0.0691378	benign
57	T	A	-0.0915691	0.0758227	benign
57	T	E	-0.0729649	0.0671184	benign
57	T	D	-0.0170725	0.075668	benign
57	T	L	0.0349763	0.0684839	benign
57	T	P	-0.000564332	0.0714195	benign
57	T	Q	-0.0105231	0.0673341	benign
57	T	H	0.0220816	0.0662002	benign
57	T	M	-0.0132937	0.073554	benign
57	T	I	-0.104939	0.0721301	benign
57	T	*	-1.32316	0.118325	pathogenic
57	T	S	0.0338668	0.064727	benign
57	T	R	0.0200796	0.0645094	benign
57	T	N	0.190719	0.0616674	benign
57	T	K	0.111817	0.0630912	benign
58	D	E	-0.00479896	0.0597471	benign
58	D	A	-0.0779323	0.076872	benign
58	D	N	-0.184984	0.0504997	benign
58	D	F	-0.0448357	0.0665717	benign
58	D	W	-0.24679	0.0695954	benign
58	D	C	-0.298166	0.0777148	benign
58	D	*	-1.33842	0.117273	pathogenic
58	D	Y	-0.251758	0.0363147	benign
58	D	V	-0.146732	0.0706364	benign
58	D	K	0.0308751	0.0653101	benign
58	D	L	-0.229404	0.0627609	benign
58	D	G	-0.0678801	0.0602827	benign
58	D	R	-0.146902	0.0747052	benign
58	D	S	-0.0307321	0.0681807	benign
58	D	I	-0.204913	0.0635587	benign
58	D	T	-0.00930364	0.0682575	benign
58	D	H	0.0181638	0.0612548	benign
58	D	Q	0.0480449	0.0603559	benign
58	D	P	-0.0603178	0.0698078	benign
58	D	M	-0.02976	0.0666015	benign
59	H	Q	-0.0239549	0.0623129	benign
59	H	P	-0.302027	0.0677229	benign
59	H	L	-0.119366	0.0630938	benign
59	H	D	-0.0924369	0.0671866	benign
59	H	E	-0.0717587	0.0678831	benign
59	H	G	0.123879	0.0687953	benign
59	H	V	-0.239286	0.0758415	benign
59	H	Y	-0.109462	0.0546006	benign
59	H	C	-0.0487043	0.0739194	benign
59	H	W	-0.168088	0.0715086	benign
59	H	F	-0.0493317	0.0634602	benign
59	H	A	-0.129036	0.0703141	benign
59	H	*	-1.25655	0.115579	pathogenic
59	H	I	-0.106811	0.0637295	benign
59	H	S	-0.0521613	0.0699672	benign
59	H	R	-0.0999385	0.0717538	benign
59	H	T	-0.116879	0.0654842	benign
59	H	K	-0.0514847	0.0709677	benign
59	H	N	-0.196187	0.036433	benign
59	H	M	-0.158807	0.0639584	benign
60	Y	C	-0.294723	0.0799942	benign
60	Y	W	-0.213089	0.103186	benign
60	Y	F	-0.367675	0.0704595	benign
60	Y	N	-0.354699	0.0704073	benign
60	Y	K	-0.356155	0.16016	benign
60	Y	T	-0.440656	0.124242	benign
60	Y	R	-0.419701	0.140036	benign
60	Y	S	-0.584903	0.150134	benign
60	Y	I	-0.426687	0.149064	benign
60	Y	P	-0.500376	0.149402	benign
60	Y	H	-0.241741	0.0698378	benign
60	Y	Q	-0.42941	0.138186	benign
60	Y	L	-0.197626	0.121116	benign
60	Y	D	-0.309953	0.0776338	benign
60	Y	E	-0.258812	0.185253	benign
60	Y	A	-0.167135	0.143793	benign
60	Y	G	-0.48248	0.217337	benign
60	Y	V	-0.107253	0.0967658	benign
60	Y	M	-0.301148	0.104555	benign
60	Y	*	-1.18726	0.229603	pathogenic
61	C	E	-1.02763	0.104463	pathogenic
61	C	W	-0.420287	0.0667746	benign
61	C	*	-0.599989	0.0530374	benign
61	C	Y	-0.342362	0.0557589	benign
61	C	V	0.020599	0.0570264	benign
61	C	A	-0.0803826	0.0617743	benign
61	C	D	-0.846421	0.0813642	pathogenic
61	C	L	-0.0341816	0.0545125	benign
61	C	P	-0.264096	0.0621225	benign
61	C	Q	-0.73822	0.0875514	pathogenic
61	C	G	-0.311864	0.0664433	benign
61	C	M	-0.0148808	0.0621927	benign
61	C	H	-0.390051	0.0748321	benign
61	C	N	-0.267414	0.063854	benign
61	C	K	-0.958997	0.0887413	pathogenic
61	C	T	0.0785998	0.0578073	benign
61	C	F	-0.291965	0.0408808	benign
61	C	R	-1.15363	0.0948861	pathogenic
61	C	S	-0.139006	0.0516212	benign
61	C	I	0.04788	0.0579511	benign
62	L	N	-0.27216	0.0646002	benign
62	L	T	-0.0288421	0.0599392	benign
62	L	R	-0.133914	0.0657604	benign
62	L	S	-0.415446	0.0756777	benign
62	L	I	0.0235823	0.057948	benign
62	L	M	-0.19059	0.0389749	benign
62	L	H	0.0686274	0.0538482	benign
62	L	Q	-0.0681365	0.052308	benign
62	L	P	-0.560867	0.079663	benign
62	L	K	-0.334166	0.0636305	benign
62	L	V	0.0299676	0.0518272	benign
62	L	F	-0.0345943	0.0612083	benign
62	L	W	-0.00363782	0.0558111	benign
62	L	D	-0.640281	0.0858294	pathogenic
62	L	E	-0.362256	0.074561	benign
62	L	A	-0.0835667	0.0705805	benign
62	L	G	-0.225657	0.0687012	benign
62	L	Y	0.0420083	0.0555578	benign
62	L	*	-1.38353	0.0979993	pathogenic
62	L	C	-0.0348713	0.0567423	benign
63	E	H	-0.00265193	0.0549299	benign
63	E	V	-0.377982	0.0699557	benign
63	E	G	0.14449	0.0795088	benign
63	E	A	0.0563691	0.0699812	benign
63	E	C	-0.164855	0.0695781	benign
63	E	W	-0.0460601	0.0709686	benign
63	E	F	-0.375039	0.0717722	benign
63	E	N	0.0239036	0.0559352	benign
63	E	K	-0.105811	0.0491184	benign
63	E	T	0.0920112	0.0532443	benign
63	E	R	-0.0350943	0.0694392	benign
63	E	S	0.157532	0.0594781	benign
63	E	I	-0.500274	0.0740746	benign
63	E	M	-0.177287	0.0645582	benign
63	E	Q	0.0462658	0.0531654	benign
63	E	P	-0.720511	0.0671253	pathogenic
63	E	L	-0.16325	0.0742251	benign
63	E	D	0.0741395	0.0662023	benign
63	E	Y	0.0178636	0.0646574	benign
63	E	*	-0.997963	0.0919196	pathogenic
64	L	I	0.0292911	0.0558724	benign
64	L	T	0.0695344	0.0480232	benign
64	L	W	-0.103388	0.0758379	benign
64	L	R	-0.151172	0.0598526	benign
64	L	*	-1.3883	0.110804	pathogenic
64	L	Y	0.0832101	0.0582911	benign
64	L	V	-0.0655863	0.059152	benign
64	L	G	-0.899419	0.078342	pathogenic
64	L	A	0.0159937	0.0592803	benign
64	L	E	-0.229926	0.0615668	benign
64	L	D	-0.835579	0.0880758	pathogenic
64	L	S	0.0384411	0.0643611	benign
64	L	N	-0.0506305	0.0615245	benign
64	L	K	0.0259572	0.0680639	benign
64	L	F	0.0763883	0.0547364	benign
64	L	C	-0.253462	0.0698053	benign
64	L	M	-0.160048	0.0431084	benign
64	L	Q	-0.185707	0.0674035	benign
64	L	P	-1.28624	0.110177	pathogenic
64	L	H	-0.224353	0.0754521	benign
65	L	Y	-0.82477	0.0809543	pathogenic
65	L	V	-0.0799691	0.0605249	benign
65	L	N	-0.1729	0.0524946	benign
65	L	K	-1.24893	0.114525	pathogenic
65	L	T	-0.154289	0.055196	benign
65	L	R	-1.24965	0.0931499	pathogenic
65	L	S	-0.146725	0.0589338	benign
65	L	I	-0.00443949	0.0513269	benign
65	L	M	-0.160122	0.0450635	benign
65	L	H	-1.15324	0.103771	pathogenic
65	L	P	-1.35881	0.114155	pathogenic
65	L	W	-1.19169	0.118655	pathogenic
65	L	F	-0.455063	0.0726083	benign
65	L	Q	-0.535402	0.0889327	benign
65	L	E	-1.2008	0.0905321	pathogenic
65	L	G	-0.713001	0.0812466	pathogenic
65	L	A	-0.172573	0.0681927	benign
65	L	C	-0.117803	0.0590504	benign
65	L	D	-1.40362	0.114617	pathogenic
65	L	*	-1.29337	0.096896	pathogenic
66	R	L	-0.361556	0.0385367	benign
66	R	D	-1.20261	0.129486	pathogenic
66	R	F	-0.335114	0.0618345	benign
66	R	W	-0.288567	0.0422362	benign
66	R	C	-0.401603	0.0722268	benign
66	R	*	-1.30875	0.120945	pathogenic
66	R	Y	-0.164776	0.0713905	benign
66	R	V	-0.410701	0.0897437	benign
66	R	P	-1.28681	0.0975213	pathogenic
66	R	M	-0.124453	0.081242	benign
66	R	A	-0.196815	0.0723713	benign
66	R	N	-0.323285	0.0782994	benign
66	R	K	0.0299934	0.0576057	benign
66	R	E	-0.387568	0.092118	benign
66	R	T	-0.58588	0.0674269	benign
66	R	S	-0.42168	0.0736007	benign
66	R	I	-0.595527	0.0695657	benign
66	R	H	-0.216282	0.0626166	benign
66	R	Q	-0.283038	0.0425448	benign
66	R	G	-0.762394	0.0952877	pathogenic
67	K	Q	-0.122293	0.0838291	benign
67	K	H	0.0158695	0.0635267	benign
67	K	S	-0.197235	0.0878701	benign
67	K	M	-0.083705	0.0671351	benign
67	K	P	-1.19182	0.11475	pathogenic
67	K	I	-0.0630103	0.0725726	benign
67	K	L	-0.115885	0.0738321	benign
67	K	Y	-0.078539	0.0676594	benign
67	K	E	-0.119281	0.0885141	benign
67	K	A	-0.180951	0.0791155	benign
67	K	G	-0.263773	0.090132	benign
67	K	V	-0.179453	0.086738	benign
67	K	*	-1.46496	0.143016	pathogenic
67	K	C	-0.0964036	0.0607085	benign
67	K	F	-0.354394	0.0647432	benign
67	K	D	-0.0878257	0.0639944	benign
67	K	R	-0.091475	0.0538188	benign
67	K	W	-0.256838	0.077764	benign
67	K	N	-0.106925	0.0496941	benign
67	K	T	-0.151543	0.0708486	benign
68	R	T	-0.0399567	0.0700187	benign
68	R	S	-0.0737552	0.0697289	benign
68	R	I	-0.391124	0.0789656	benign
68	R	M	0.0430331	0.0719216	benign
68	R	H	-0.090712	0.0626699	benign
68	R	Q	-0.315908	0.0446541	benign
68	R	P	-1.31719	0.116744	pathogenic
68	R	K	0.0778933	0.0635732	benign
68	R	L	-0.270757	0.0321497	benign
68	R	N	-0.115257	0.0698073	benign
68	R	E	-0.477814	0.0721387	benign
68	R	A	-0.0297634	0.0632546	benign
68	R	G	-0.149267	0.0593507	benign
68	R	V	-0.188976	0.0715146	benign
68	R	Y	-0.0588492	0.0733349	benign
68	R	*	-1.28202	0.151465	pathogenic
68	R	C	0.0470662	0.062445	benign
68	R	W	-0.199948	0.0442066	benign
68	R	F	0.0605679	0.0592846	benign
68	R	D	-0.641151	0.0885447	pathogenic
69	D	Q	-1.41687	0.089663	pathogenic
69	D	H	-0.334747	0.0662769	benign
69	D	M	-1.38258	0.0923179	pathogenic
69	D	P	-1.30547	0.117069	pathogenic
69	D	N	-0.599663	0.0749215	benign
69	D	K	-1.25488	0.107835	pathogenic
69	D	T	-1.56903	0.109657	pathogenic
69	D	R	-1.35473	0.11242	pathogenic
69	D	L	-1.51085	0.100518	pathogenic
69	D	E	-0.305193	0.0397562	benign
69	D	I	-1.47115	0.11599	pathogenic
69	D	F	-1.42442	0.100604	pathogenic
69	D	W	-0.221882	0.0574612	benign
69	D	C	-0.841643	0.075171	pathogenic
69	D	*	-1.24121	0.0963574	pathogenic
69	D	S	-1.1603	0.0986309	pathogenic
69	D	Y	-1.27731	0.100218	pathogenic
69	D	V	-1.21315	0.0997889	pathogenic
69	D	G	-1.33517	0.11823	pathogenic
69	D	A	-1.29039	0.106736	pathogenic
70	Y	N	-0.161564	0.0579349	benign
70	Y	V	-0.257448	0.0596246	benign
70	Y	G	-0.601754	0.0710357	pathogenic
70	Y	A	-0.23742	0.0605551	benign
70	Y	E	-0.595145	0.0699747	benign
70	Y	D	-0.929376	0.0825213	pathogenic
70	Y	L	-0.130217	0.0555667	benign
70	Y	Q	-0.223698	0.0554322	benign
70	Y	I	-0.182079	0.0602359	benign
70	Y	S	-0.215123	0.0683116	benign
70	Y	R	-0.068715	0.0614279	benign
70	Y	T	-0.18952	0.063045	benign
70	Y	K	-0.210359	0.0669635	benign
70	Y	M	-0.169809	0.0564791	benign
70	Y	H	0.0984686	0.0571892	benign
70	Y	W	-0.195203	0.0593342	benign
70	Y	F	-0.0597721	0.0590731	benign
70	Y	C	-0.413324	0.0631641	benign
70	Y	*	-1.22266	0.099265	pathogenic
71	E	T	-0.0151288	0.0550699	benign
71	E	K	-1.1397	0.0947017	pathogenic
71	E	N	-0.0702807	0.0612324	benign
71	E	P	-0.391726	0.0672207	benign
71	E	F	-0.414957	0.065404	benign
71	E	W	-0.949053	0.0894743	pathogenic
71	E	C	-0.116258	0.069691	benign
71	E	Q	-0.278526	0.0678561	benign
71	E	L	-0.246747	0.0677409	benign
71	E	*	-1.25693	0.0958085	pathogenic
71	E	H	-0.147083	0.062434	benign
71	E	M	-0.216333	0.0779944	benign
71	E	S	-0.316006	0.067534	benign
71	E	R	-1.15677	0.110625	pathogenic
71	E	I	0.00329037	0.0616212	benign
71	E	A	-0.196794	0.0621437	benign
71	E	G	-0.298458	0.0648483	benign
71	E	V	-0.091276	0.0616655	benign
71	E	Y	-0.302052	0.0650244	benign
71	E	D	-0.0755304	0.0454677	benign
72	G	P	-0.870228	0.0752139	pathogenic
72	G	A	0.0904615	0.0561389	benign
72	G	E	-0.39818	0.0612911	benign
72	G	D	-0.397551	0.0695919	benign
72	G	L	-0.119762	0.054426	benign
72	G	Q	-0.0195951	0.0585648	benign
72	G	N	-0.0443458	0.0648078	benign
72	G	M	-0.0812929	0.0638102	benign
72	G	I	-0.287803	0.0684933	benign
72	G	S	-0.0153037	0.0568591	benign
72	G	R	-0.738004	0.0850679	pathogenic
72	G	K	-0.499943	0.0710865	benign
72	G	H	-0.0309849	0.0589889	benign
72	G	T	-0.177065	0.0634511	benign
72	G	C	-0.194487	0.0594688	benign
72	G	F	-0.13133	0.0663849	benign
72	G	W	0.0172822	0.054634	benign
72	G	*	-1.32668	0.106382	pathogenic
72	G	Y	-0.237349	0.0659361	benign
72	G	V	-0.245758	0.06142	benign
73	Y	E	-1.18103	0.0749945	pathogenic
73	Y	T	-0.876392	0.072977	pathogenic
73	Y	R	-1.307	0.103667	pathogenic
73	Y	S	-2.02765	0.104595	pathogenic
73	Y	V	-1.1255	0.0750324	pathogenic
73	Y	I	-1.08561	0.105343	pathogenic
73	Y	M	-0.235693	0.052177	benign
73	Y	H	-0.852427	0.0808064	pathogenic
73	Y	Q	-1.23434	0.0878649	pathogenic
73	Y	P	-1.32965	0.110919	pathogenic
73	Y	N	-1.45967	0.113416	pathogenic
73	Y	D	-1.2098	0.0999017	pathogenic
73	Y	K	-1.28419	0.0855625	pathogenic
73	Y	A	-0.966185	0.0828712	pathogenic
73	Y	G	-1.38912	0.0957516	pathogenic
73	Y	*	-1.15594	0.113807	pathogenic
73	Y	C	-0.62676	0.0732292	pathogenic
73	Y	W	0.122291	0.0546201	benign
73	Y	F	0.088527	0.0561046	benign
73	Y	L	0.0472291	0.0536636	benign
74	L	D	-1.41829	0.125778	pathogenic
74	L	H	-1.17423	0.112034	pathogenic
74	L	R	-1.19956	0.100794	pathogenic
74	L	S	-1.13081	0.0938563	pathogenic
74	L	M	0.0145701	0.0554159	benign
74	L	Q	-1.05646	0.0876409	pathogenic
74	L	P	-1.53577	0.121956	pathogenic
74	L	E	-1.33522	0.11756	pathogenic
74	L	A	-0.598141	0.0720758	benign
74	L	G	-1.34482	0.114294	pathogenic
74	L	V	0.0403244	0.0518441	benign
74	L	Y	-0.25426	0.0710371	benign
74	L	*	-0.581789	0.050545	benign
74	L	C	-0.0255065	0.0610961	benign
74	L	W	-1.07853	0.096989	pathogenic
74	L	T	-0.678746	0.0795417	pathogenic
74	L	K	-1.28591	0.108543	pathogenic
74	L	I	0.03134	0.0566099	benign
74	L	F	-0.195594	0.0508683	benign
74	L	N	-0.816667	0.0812242	pathogenic
75	C	T	-0.0253634	0.0543016	benign
75	C	R	-0.590656	0.0686833	benign
75	C	S	-0.0852498	0.0501546	benign
75	C	I	0.0824509	0.0496292	benign
75	C	M	0.00873705	0.0530766	benign
75	C	K	-1.11761	0.0957787	pathogenic
75	C	H	0.0637615	0.0523637	benign
75	C	L	0.0303025	0.0524815	benign
75	C	D	-1.03842	0.0842158	pathogenic
75	C	E	-0.0869411	0.0583249	benign
75	C	A	-0.0271766	0.0501015	benign
75	C	G	-0.310092	0.0436421	benign
75	C	V	-0.0010456	0.0549246	benign
75	C	P	-0.756621	0.0725	pathogenic
75	C	Q	-0.0476627	0.0586826	benign
75	C	N	-0.159713	0.0621222	benign
75	C	F	-0.133045	0.0422067	benign
75	C	Y	-0.293852	0.04713	benign
75	C	*	-0.490309	0.0505208	benign
75	C	W	-0.164765	0.0618524	benign
76	S	K	-1.51521	0.111044	pathogenic
76	S	T	-0.0607174	0.0501194	benign
76	S	R	-1.21454	0.102923	pathogenic
76	S	I	-0.524703	0.077695	benign
76	S	M	-0.383763	0.0644609	benign
76	S	Q	-0.994494	0.0947118	pathogenic
76	S	P	-0.644279	0.0575975	pathogenic
76	S	L	-0.450288	0.0638901	benign
76	S	D	-1.21128	0.0953055	pathogenic
76	S	E	-1.285	0.107589	pathogenic
76	S	A	-0.0157464	0.0505533	benign
76	S	N	-0.143136	0.0622169	benign
76	S	H	-0.966582	0.090998	pathogenic
76	S	V	-0.303141	0.0626548	benign
76	S	W	-0.665428	0.0779386	pathogenic
76	S	C	-0.0168812	0.0612581	benign
76	S	*	-1.25506	0.0980791	pathogenic
76	S	Y	-0.383409	0.0355196	benign
76	S	G	0.081767	0.0583677	benign
76	S	F	-0.71382	0.0652824	pathogenic
77	L	H	-0.926277	0.0868492	pathogenic
77	L	M	-0.323461	0.0325777	benign
77	L	I	-0.20528	0.0605981	benign
77	L	S	-0.970996	0.0787228	pathogenic
77	L	R	-1.1461	0.0802535	pathogenic
77	L	T	-0.746381	0.0762095	pathogenic
77	L	K	-1.10116	0.0951651	pathogenic
77	L	N	-1.08331	0.0819674	pathogenic
77	L	C	-0.674229	0.0830015	pathogenic
77	L	*	-1.30441	0.094216	pathogenic
77	L	Y	-0.958614	0.086867	pathogenic
77	L	V	-0.480611	0.0664517	benign
77	L	G	-0.929823	0.0781807	pathogenic
77	L	A	-0.812709	0.093444	pathogenic
77	L	E	-1.15924	0.090615	pathogenic
77	L	D	-1.16284	0.097667	pathogenic
77	L	F	-0.745611	0.063977	pathogenic
77	L	Q	-0.644766	0.0613804	pathogenic
77	L	P	-1.1595	0.0966293	pathogenic
77	L	W	-0.68682	0.0650075	pathogenic
78	L	H	-0.474178	0.0591986	benign
78	L	R	-0.96747	0.0857523	pathogenic
78	L	T	-0.141483	0.0576035	benign
78	L	K	-0.987226	0.0845787	pathogenic
78	L	N	-0.161158	0.0568695	benign
78	L	M	-0.142745	0.0427617	benign
78	L	S	-0.449712	0.0679909	benign
78	L	D	-1.28968	0.108353	pathogenic
78	L	E	-1.29258	0.10519	pathogenic
78	L	A	-0.047216	0.0553939	benign
78	L	G	-0.449802	0.0678974	benign
78	L	V	-0.112467	0.0507479	benign
78	L	I	-0.00844046	0.0493524	benign
78	L	*	-1.3372	0.0796513	pathogenic
78	L	C	0.0555104	0.0447719	benign
78	L	W	-0.744687	0.0647144	pathogenic
78	L	F	-0.10749	0.0501488	benign
78	L	Y	-0.423354	0.0531911	benign
78	L	P	-0.124156	0.0492739	benign
78	L	Q	-0.68767	0.0600496	pathogenic
79	L	H	0.0596712	0.045602	benign
79	L	Q	-0.064185	0.061468	benign
79	L	P	-0.706358	0.0567577	pathogenic
79	L	R	-1.13626	0.110877	pathogenic
79	L	T	0.105529	0.0615513	benign
79	L	K	-0.60018	0.0734359	pathogenic
79	L	M	-0.00700969	0.0484468	benign
79	L	N	-0.105989	0.0569299	benign
79	L	I	-0.0804383	0.0414028	benign
79	L	*	-1.32768	0.0902988	pathogenic
79	L	C	0.0932647	0.0512949	benign
79	L	V	0.0579935	0.0519083	benign
79	L	G	-0.148208	0.0618029	benign
79	L	A	0.166477	0.0610689	benign
79	L	E	-1.20705	0.118122	pathogenic
79	L	Y	0.140168	0.0518053	benign
79	L	D	-1.16511	0.0939822	pathogenic
79	L	W	0.0444686	0.0498012	benign
79	L	F	0.0481225	0.0445901	benign
79	L	S	0.00286565	0.0541424	benign
80	P	I	-1.17642	0.0870009	pathogenic
80	P	R	-0.349121	0.067011	benign
80	P	T	-0.216379	0.0521915	benign
80	P	K	-0.257024	0.0518621	benign
80	P	N	-0.100265	0.0556923	benign
80	P	H	-0.376511	0.0710678	benign
80	P	Q	-0.485592	0.0511067	benign
80	P	S	-0.128132	0.0569058	benign
80	P	M	-0.92195	0.0711372	pathogenic
80	P	F	-1.19607	0.0825372	pathogenic
80	P	D	-0.0387762	0.0556799	benign
80	P	W	-1.24907	0.0950861	pathogenic
80	P	C	-0.427912	0.0654967	benign
80	P	*	-1.48312	0.0994627	pathogenic
80	P	Y	-1.2395	0.090583	pathogenic
80	P	V	-1.13639	0.0738323	pathogenic
80	P	G	-0.0957478	0.0572586	benign
80	P	A	-0.138196	0.0591124	benign
80	P	E	-0.299975	0.0562691	benign
80	P	L	-1.28476	0.0879241	pathogenic
81	A	Q	0.0927871	0.0498549	benign
81	A	E	0.0349537	0.0520197	benign
81	A	D	0.0128175	0.0537623	benign
81	A	L	0.00853069	0.0461972	benign
81	A	K	0.164841	0.0472039	benign
81	A	P	0.054077	0.0508276	benign
81	A	T	0.0947123	0.0452842	benign
81	A	R	0.0801565	0.048146	benign
81	A	S	0.033053	0.0543719	benign
81	A	H	0.132392	0.0481945	benign
81	A	M	0.118015	0.0468995	benign
81	A	I	-0.0355105	0.0504855	benign
81	A	N	0.0586399	0.0489387	benign
81	A	F	-0.0167197	0.051026	benign
81	A	W	-0.011612	0.0519166	benign
81	A	C	0.0484091	0.050334	benign
81	A	*	-1.32251	0.0903194	pathogenic
81	A	Y	0.0453632	0.0486927	benign
81	A	V	0.0975562	0.0498088	benign
81	A	G	-0.00483274	0.0555828	benign
82	E	S	0.0693695	0.0528963	benign
82	E	R	0.149318	0.0478734	benign
82	E	T	0.108616	0.0467762	benign
82	E	K	0.0820085	0.0539694	benign
82	E	N	0.0397358	0.0470244	benign
82	E	C	0.11666	0.0546772	benign
82	E	W	0.150669	0.0499002	benign
82	E	I	0.0549468	0.0476828	benign
82	E	*	-1.31343	0.0956068	pathogenic
82	E	Y	0.107101	0.0500107	benign
82	E	V	-0.012154	0.0542085	benign
82	E	G	-0.0520765	0.0685037	benign
82	E	A	-0.0302188	0.0636053	benign
82	E	D	-0.0521264	0.0547936	benign
82	E	F	0.0502481	0.045023	benign
82	E	M	-0.00142356	0.052362	benign
82	E	H	0.178745	0.0474248	benign
82	E	Q	0.114091	0.0463062	benign
82	E	P	0.159622	0.0467473	benign
82	E	L	0.0243808	0.048466	benign
83	S	W	-0.00487402	0.049286	benign
83	S	F	0.0743421	0.0473804	benign
83	S	Y	-0.113742	0.0353816	benign
83	S	V	0.0355022	0.0551639	benign
83	S	G	0.0385571	0.0486164	benign
83	S	A	0.0900454	0.0470276	benign
83	S	D	-0.164213	0.0475602	benign
83	S	L	-0.0749665	0.0487088	benign
83	S	Q	0.0720494	0.0461717	benign
83	S	C	-0.0283048	0.049379	benign
83	S	H	0.0639013	0.0485746	benign
83	S	M	0.0106024	0.0475281	benign
83	S	I	0.00953961	0.0505986	benign
83	S	R	0.07157	0.0454068	benign
83	S	T	0.036929	0.0457975	benign
83	S	K	0.0814884	0.0464501	benign
83	S	N	0.0536206	0.0479929	benign
83	S	P	-0.036506	0.0472084	benign
83	S	*	-1.39323	0.0808875	pathogenic
83	S	E	0.0219548	0.0507858	benign
84	R	I	-0.234816	0.0659313	benign
84	R	M	-0.0847825	0.0626097	benign
84	R	H	-0.0694208	0.0690741	benign
84	R	Q	-0.174361	0.0743195	benign
84	R	P	-1.236	0.123782	pathogenic
84	R	T	-0.431334	0.0874851	benign
84	R	K	-0.123168	0.0629432	benign
84	R	N	-0.833776	0.0851826	pathogenic
84	R	L	-0.161416	0.0614867	benign
84	R	F	-0.722469	0.0792865	pathogenic
84	R	S	-0.579645	0.0773764	benign
84	R	D	-1.43316	0.115	pathogenic
84	R	E	-1.36016	0.112879	pathogenic
84	R	C	-0.427855	0.073643	benign
84	R	A	-0.259638	0.0679642	benign
84	R	G	-0.930225	0.088737	pathogenic
84	R	V	-0.169421	0.0586387	benign
84	R	Y	-0.533142	0.0688922	benign
84	R	*	-0.643166	0.0582519	pathogenic
84	R	W	-0.330167	0.0617428	benign
85	S	I	-0.140459	0.0396602	benign
85	S	A	0.0137748	0.0560602	benign
85	S	D	-0.0689339	0.059495	benign
85	S	L	-0.026828	0.0545397	benign
85	S	W	0.0563248	0.0544107	benign
85	S	P	0.0649498	0.0533685	benign
85	S	H	-0.0267261	0.056408	benign
85	S	M	-0.0664799	0.0565862	benign
85	S	E	-0.137846	0.0530287	benign
85	S	Q	0.00614501	0.055729	benign
85	S	C	-0.0620332	0.0527592	benign
85	S	K	-0.0605852	0.0601364	benign
85	S	*	-1.20875	0.095998	pathogenic
85	S	Y	-0.0506916	0.0637381	benign
85	S	V	0.0027607	0.0530494	benign
85	S	G	-0.115922	0.0497345	benign
85	S	N	-0.0701279	0.047781	benign
85	S	F	-0.15439	0.0564591	benign
85	S	T	-0.00722658	0.0525611	benign
85	S	R	-0.0930485	0.0395062	benign
86	S	I	-1.33086	0.0941793	pathogenic
86	S	N	-0.366454	0.0598185	benign
86	S	K	-1.16193	0.0899878	pathogenic
86	S	Y	-0.313411	0.0581995	benign
86	S	V	-1.24766	0.0862954	pathogenic
86	S	G	0.0171915	0.0634366	benign
86	S	A	0.0565597	0.0559977	benign
86	S	E	-0.464853	0.0680282	benign
86	S	D	-0.142422	0.0538426	benign
86	S	*	-1.25349	0.0905903	pathogenic
86	S	T	-0.587592	0.0642607	benign
86	S	W	-1.02916	0.0830933	pathogenic
86	S	L	-1.13032	0.0921129	pathogenic
86	S	P	-0.238334	0.0626187	benign
86	S	Q	-0.444117	0.0601843	benign
86	S	M	-0.485173	0.0646696	benign
86	S	R	-1.25566	0.0926755	pathogenic
86	S	C	-0.18663	0.0594445	benign
86	S	H	-0.0820823	0.055482	benign
87	V	*	-1.37586	0.102546	pathogenic
87	V	Y	-0.024358	0.0533157	benign
87	V	G	-0.0999404	0.0591215	benign
87	V	E	-0.965221	0.0734493	pathogenic
87	V	D	-1.1096	0.0774211	pathogenic
87	V	L	-0.0976799	0.0499399	benign
87	V	P	-1.205	0.086871	pathogenic
87	V	Q	-0.231922	0.0486512	benign
87	V	H	0.023033	0.0501225	benign
87	V	M	-0.0525461	0.0484063	benign
87	V	A	0.124098	0.0499518	benign
87	V	S	0.0677691	0.0528205	benign
87	V	R	-1.38846	0.09947	pathogenic
87	V	T	-0.0649373	0.0484869	benign
87	V	K	-1.3033	0.0942414	pathogenic
87	V	N	0.0383749	0.0519372	benign
87	V	F	0.011271	0.0492423	benign
87	V	W	-0.679889	0.0665532	pathogenic
87	V	I	0.0457605	0.0552812	benign
87	V	C	0.0610444	0.058588	benign
88	F	G	0.0694533	0.0557135	benign
88	F	A	0.102717	0.0483071	benign
88	F	E	-0.926134	0.0831572	pathogenic
88	F	D	-1.2574	0.0917885	pathogenic
88	F	L	-0.0130212	0.0470705	benign
88	F	P	-1.155	0.0846306	pathogenic
88	F	R	-0.278805	0.0549433	benign
88	F	H	-0.0912986	0.0527122	benign
88	F	I	0.0414517	0.0516968	benign
88	F	T	-0.0100048	0.0485238	benign
88	F	K	-0.47635	0.0612281	benign
88	F	N	-0.0489458	0.0567135	benign
88	F	V	0.0311779	0.0520878	benign
88	F	Q	-0.022432	0.0485624	benign
88	F	Y	-0.123238	0.0517147	benign
88	F	S	-0.177318	0.0582422	benign
88	F	C	0.0555962	0.0540572	benign
88	F	*	-1.13082	0.0902324	pathogenic
88	F	M	0.066096	0.0495784	benign
88	F	W	0.043254	0.0533074	benign
89	A	K	-1.33024	0.123672	pathogenic
89	A	C	-0.740898	0.0748213	pathogenic
89	A	N	-1.29475	0.104394	pathogenic
89	A	W	-1.24318	0.104349	pathogenic
89	A	F	-1.3928	0.111183	pathogenic
89	A	V	-1.10258	0.106288	pathogenic
89	A	G	-0.262235	0.0565233	benign
89	A	*	-1.34016	0.0938232	pathogenic
89	A	E	-1.22419	0.115994	pathogenic
89	A	Y	-1.2656	0.124772	pathogenic
89	A	L	-1.44015	0.12755	pathogenic
89	A	T	-0.767299	0.090119	pathogenic
89	A	R	-1.07801	0.106767	pathogenic
89	A	P	-1.29673	0.114053	pathogenic
89	A	S	-0.254711	0.0757645	benign
89	A	I	-1.18435	0.115988	pathogenic
89	A	M	-1.0917	0.122738	pathogenic
89	A	H	-1.42348	0.105844	pathogenic
89	A	D	-1.2192	0.104961	pathogenic
89	A	Q	-1.31628	0.102714	pathogenic
90	L	F	-1.0111	0.102092	pathogenic
90	L	D	-1.17234	0.114555	pathogenic
90	L	E	-1.09136	0.106109	pathogenic
90	L	A	-0.502396	0.0930254	benign
90	L	V	-0.112233	0.0564453	benign
90	L	Y	-1.41658	0.132628	pathogenic
90	L	W	-1.07394	0.114723	pathogenic
90	L	G	-1.19559	0.142214	pathogenic
90	L	Q	-0.725205	0.0822169	pathogenic
90	L	*	-1.46593	0.11845	pathogenic
90	L	H	-1.43541	0.138382	pathogenic
90	L	M	-0.344169	0.0459842	benign
90	L	I	0.0377794	0.0653916	benign
90	L	S	-1.24583	0.151315	pathogenic
90	L	R	-1.15173	0.110458	pathogenic
90	L	T	-0.299808	0.0767235	benign
90	L	K	-1.239	0.124124	pathogenic
90	L	N	-1.30618	0.15349	pathogenic
90	L	P	-1.27016	0.119464	pathogenic
90	L	C	-0.168401	0.072408	benign
91	R	S	-0.526713	0.0645812	benign
91	R	P	-1.38835	0.0823395	pathogenic
91	R	Q	-0.20353	0.0631255	benign
91	R	E	-1.10537	0.143229	pathogenic
91	R	I	-1.26356	0.0747218	pathogenic
91	R	M	-0.33748	0.0343537	benign
91	R	H	-0.165618	0.0566857	benign
91	R	K	-0.142482	0.0440817	benign
91	R	N	-0.137733	0.0461886	benign
91	R	L	-0.218998	0.0655432	benign
91	R	T	-1.28305	0.0750663	pathogenic
91	R	D	-1.40451	0.120674	pathogenic
91	R	W	-0.340421	0.0558636	benign
91	R	Y	-0.265317	0.0551196	benign
91	R	V	-1.20774	0.119948	pathogenic
91	R	G	-0.271652	0.0813921	benign
91	R	A	-0.569972	0.0750026	benign
91	R	F	-0.58943	0.0653768	benign
91	R	*	-1.38294	0.115577	pathogenic
91	R	C	-0.965262	0.0855766	pathogenic
92	A	H	-1.06404	0.0913367	pathogenic
92	A	V	-0.612621	0.0713934	pathogenic
92	A	Y	-1.01976	0.0930915	pathogenic
92	A	*	-1.24185	0.0866624	pathogenic
92	A	C	0.00344648	0.0512826	benign
92	A	W	-0.636898	0.0699324	pathogenic
92	A	F	-1.20763	0.0866496	pathogenic
92	A	E	-1.39377	0.103027	pathogenic
92	A	D	-0.45503	0.0429454	benign
92	A	L	-0.637922	0.0696289	pathogenic
92	A	N	-1.08632	0.0897477	pathogenic
92	A	G	-0.199055	0.0641998	benign
92	A	T	-0.330556	0.0524257	benign
92	A	P	-1.04918	0.073202	pathogenic
92	A	S	0.0359133	0.058588	benign
92	A	I	-0.950253	0.0793623	pathogenic
92	A	M	-0.282204	0.0632318	benign
92	A	Q	-1.49364	0.481467	pathogenic
92	A	K	-1.26128	0.0922935	pathogenic
92	A	R	-1.03748	0.107796	pathogenic
93	F	S	-1.25391	0.11801	pathogenic
93	F	T	-1.33575	0.0930337	pathogenic
93	F	R	-1.07903	0.0945015	pathogenic
93	F	I	-1.27198	0.080391	pathogenic
93	F	M	-0.342113	0.0582834	benign
93	F	H	-1.26304	0.0993395	pathogenic
93	F	Q	-1.41481	0.101029	pathogenic
93	F	P	-1.34211	0.0902943	pathogenic
93	F	L	-0.129922	0.0584457	benign
93	F	K	-1.31742	0.0975379	pathogenic
93	F	D	-1.09445	0.0986715	pathogenic
93	F	A	-1.4058	0.0990513	pathogenic
93	F	G	-1.29287	0.0980975	pathogenic
93	F	V	-1.09733	0.0920356	pathogenic
93	F	Y	-0.073708	0.0569211	benign
93	F	*	-1.38555	0.0880643	pathogenic
93	F	C	-1.20573	0.101982	pathogenic
93	F	W	0.0951105	0.0525952	benign
93	F	E	-1.29054	0.10055	pathogenic
93	F	N	-1.4445	0.110194	pathogenic
94	N	G	-0.465333	0.0696628	benign
94	N	K	-0.685604	0.0541755	pathogenic
94	N	V	-0.707633	0.0598873	pathogenic
94	N	F	-0.492722	0.0615532	benign
94	N	Y	-0.386958	0.0559311	benign
94	N	*	-1.49085	0.104951	pathogenic
94	N	C	-0.594103	0.0741299	benign
94	N	W	-0.664783	0.0573317	pathogenic
94	N	A	-0.494841	0.0580668	benign
94	N	E	-0.706509	0.058634	pathogenic
94	N	D	-0.508321	0.070494	benign
94	N	P	-1.45497	0.11067	pathogenic
94	N	Q	-0.31843	0.0531438	benign
94	N	H	-0.524961	0.0603293	benign
94	N	L	-0.949933	0.0622429	pathogenic
94	N	I	-0.983784	0.0850942	pathogenic
94	N	S	-0.378762	0.0809856	benign
94	N	R	-1.14731	0.091497	pathogenic
94	N	T	-0.736274	0.0733906	pathogenic
94	N	M	-0.713019	0.0570824	pathogenic
95	V	I	0.0535565	0.0527544	benign
95	V	S	0.0331315	0.0538268	benign
95	V	R	-0.987345	0.0685703	pathogenic
95	V	K	-1.12054	0.0693963	pathogenic
95	V	N	-0.556959	0.0657467	benign
95	V	*	-1.32764	0.0767887	pathogenic
95	V	C	0.0776464	0.0435736	benign
95	V	W	-0.592753	0.0543325	benign
95	V	F	-0.522323	0.0592134	benign
95	V	M	-0.365188	0.0517233	benign
95	V	Y	-0.433842	0.0604013	benign
95	V	H	-0.739953	0.0600701	pathogenic
95	V	T	0.0179898	0.0465532	benign
95	V	P	-1.29539	0.0849769	pathogenic
95	V	L	-0.181099	0.0499452	benign
95	V	D	-1.02228	0.0868816	pathogenic
95	V	E	-0.609674	0.0587568	pathogenic
95	V	A	-0.0430168	0.0504585	benign
95	V	G	-0.302695	0.0549028	benign
95	V	Q	-0.575988	0.0518998	benign
96	E	W	-0.916423	0.0848097	pathogenic
96	E	D	-0.153139	0.0473134	benign
96	E	C	-0.12412	0.0592792	benign
96	E	*	-1.41178	0.0845424	pathogenic
96	E	Y	-0.47664	0.0672861	benign
96	E	V	-0.189425	0.0495291	benign
96	E	L	-0.0816854	0.0501024	benign
96	E	P	-1.37482	0.0967744	pathogenic
96	E	Q	-0.0646318	0.0549088	benign
96	E	I	-0.162564	0.0628568	benign
96	E	M	-0.0686288	0.0600433	benign
96	E	F	-0.678903	0.0683817	pathogenic
96	E	S	-0.00260964	0.0584137	benign
96	E	G	-0.55567	0.0749115	benign
96	E	R	-0.568699	0.0587693	benign
96	E	T	-0.0918397	0.0539169	benign
96	E	K	-0.100859	0.0678927	benign
96	E	N	-0.202862	0.0528051	benign
96	E	A	-0.143403	0.067017	benign
96	E	H	-0.225681	0.0563677	benign
97	L	P	-1.41183	0.126631	pathogenic
97	L	N	-0.878885	0.0910403	pathogenic
97	L	H	-1.28053	0.118214	pathogenic
97	L	M	-0.182688	0.0430284	benign
97	L	I	0.097768	0.0683709	benign
97	L	S	-0.20303	0.0834551	benign
97	L	R	-1.39261	0.105311	pathogenic
97	L	T	-0.0498698	0.0703261	benign
97	L	K	-1.45941	0.122069	pathogenic
97	L	*	-1.34542	0.0925865	pathogenic
97	L	Q	-0.68265	0.0666799	pathogenic
97	L	F	-1.35444	0.0864084	pathogenic
97	L	Y	-1.35077	0.122977	pathogenic
97	L	C	-0.134852	0.0590074	benign
97	L	D	-1.36342	0.132913	pathogenic
97	L	E	-1.36755	0.0928096	pathogenic
97	L	A	-0.0956016	0.0646485	benign
97	L	G	-1.24112	0.121104	pathogenic
97	L	V	-0.0332838	0.0497439	benign
97	L	W	-1.30884	0.097038	pathogenic
98	A	N	-0.491615	0.0815728	benign
98	A	K	-0.852374	0.0829862	pathogenic
98	A	T	-0.164404	0.062655	benign
98	A	R	-0.587797	0.0816906	benign
98	A	S	0.0721991	0.0511998	benign
98	A	I	-0.48794	0.0792035	benign
98	A	H	-0.334649	0.0744995	benign
98	A	Q	-0.630325	0.0836219	pathogenic
98	A	P	-0.824845	0.0856857	pathogenic
98	A	L	-0.429355	0.0693055	benign
98	A	D	-0.47567	0.0785662	benign
98	A	E	-0.512015	0.0664988	benign
98	A	G	-0.0998683	0.0569181	benign
98	A	V	-0.175133	0.0662828	benign
98	A	Y	-0.502734	0.0721473	benign
98	A	*	-1.33026	0.0848761	pathogenic
98	A	M	-0.527922	0.0861765	benign
98	A	W	-0.77705	0.0706715	pathogenic
98	A	F	-0.860893	0.0723011	pathogenic
98	A	C	0.0262238	0.0550551	benign
99	Q	E	0.00457373	0.0459038	benign
99	Q	A	0.117649	0.0547317	benign
99	Q	G	0.153022	0.0497876	benign
99	Q	V	-0.213184	0.059061	benign
99	Q	Y	0.00688192	0.0516967	benign
99	Q	N	0.0660164	0.0495451	benign
99	Q	K	-0.288382	0.0355737	benign
99	Q	T	-0.0369906	0.0589062	benign
99	Q	R	-0.109363	0.0620026	benign
99	Q	S	-0.0197341	0.0582031	benign
99	Q	I	-0.13516	0.0604798	benign
99	Q	M	0.112658	0.0595588	benign
99	Q	H	0.0644512	0.0487428	benign
99	Q	*	-1.2668	0.0910739	pathogenic
99	Q	C	-0.0717779	0.0605561	benign
99	Q	W	-0.00966929	0.0606874	benign
99	Q	F	-0.0706893	0.0616325	benign
99	Q	L	-0.132976	0.0481901	benign
99	Q	P	-0.76816	0.0656892	pathogenic
99	Q	D	0.121507	0.0485614	benign
100	V	D	-0.603529	0.0745958	pathogenic
100	V	H	-0.482956	0.0703639	benign
100	V	Q	-0.0508453	0.064233	benign
100	V	P	-0.531909	0.0999671	benign
100	V	L	0.0902902	0.0544188	benign
100	V	S	-0.296002	0.0603912	benign
100	V	F	-0.241956	0.0745199	benign
100	V	W	-0.414423	0.068761	benign
100	V	C	-0.0959068	0.0603513	benign
100	V	*	-1.45745	0.100307	pathogenic
100	V	Y	-0.429395	0.0602425	benign
100	V	E	-0.43008	0.0704199	benign
100	V	A	0.0170221	0.0619739	benign
100	V	G	-0.361191	0.0606285	benign
100	V	R	-0.484561	0.0624468	benign
100	V	T	0.0567299	0.063887	benign
100	V	K	-0.545076	0.0819244	benign
100	V	N	-0.441239	0.0852263	benign
100	V	M	-0.0486567	0.0609712	benign
100	V	I	0.148359	0.0617238	benign
101	K	S	0.137069	0.0609305	benign
101	K	Q	0.127384	0.0549824	benign
101	K	P	0.050343	0.0463903	benign
101	K	L	0.0346858	0.0568032	benign
101	K	D	-0.0783241	0.0689751	benign
101	K	H	0.109034	0.0544622	benign
101	K	M	0.0335897	0.0486442	benign
101	K	E	-0.195899	0.0628772	benign
101	K	R	-0.110002	0.0575528	benign
101	K	T	-0.177328	0.0636598	benign
101	K	N	0.0478903	0.0513076	benign
101	K	V	0.0513523	0.0529771	benign
101	K	Y	0.0572139	0.0532455	benign
101	K	*	-1.25843	0.124842	pathogenic
101	K	G	0.0232379	0.0594707	benign
101	K	A	0.0280389	0.0608094	benign
101	K	I	-0.0373523	0.0533691	benign
101	K	F	0.0316547	0.0549514	benign
101	K	W	-0.0198999	0.0627123	benign
101	K	C	0.0415383	0.0562717	benign
102	D	A	-0.170707	0.0561012	benign
102	D	T	-0.0956204	0.0550588	benign
102	D	K	-0.549852	0.0694038	benign
102	D	N	-0.297626	0.0510919	benign
102	D	V	-0.366576	0.0783523	benign
102	D	Y	-0.336451	0.0378664	benign
102	D	*	-1.41443	0.10261	pathogenic
102	D	C	-0.0914109	0.058474	benign
102	D	W	-0.29031	0.06179	benign
102	D	F	-0.30813	0.0696329	benign
102	D	G	-0.156058	0.0535991	benign
102	D	E	0.0558583	0.0500445	benign
102	D	R	-0.495426	0.0726685	benign
102	D	S	-0.121388	0.0639001	benign
102	D	L	-0.439603	0.121257	benign
102	D	P	-0.16118	0.060641	benign
102	D	I	-0.376461	0.11656	benign
102	D	H	-0.568114	0.0710593	benign
102	D	M	-0.161762	0.115603	benign
102	D	Q	-0.121467	0.0606708	benign
103	S	C	-0.00811879	0.05798	benign
103	S	*	-0.935382	0.0795647	pathogenic
103	S	W	-0.0331669	0.051994	benign
103	S	Y	0.0464699	0.0641529	benign
103	S	V	0.0154323	0.0643031	benign
103	S	G	0.0943022	0.0548582	benign
103	S	A	-0.0229022	0.0579987	benign
103	S	E	-0.0048267	0.0507341	benign
103	S	D	0.133622	0.0542817	benign
103	S	F	0.00604723	0.0597822	benign
103	S	P	-0.251124	0.060195	benign
103	S	L	-0.148401	0.0586091	benign
103	S	K	-0.526722	0.0624092	benign
103	S	R	-0.167506	0.0533486	benign
103	S	N	0.0711071	0.051996	benign
103	S	T	0.137857	0.0616359	benign
103	S	Q	-0.0211494	0.05531	benign
103	S	H	-0.0089561	0.0612723	benign
103	S	M	0.00176065	0.0511087	benign
103	S	I	-0.112255	0.0559274	benign
104	V	K	-0.252981	0.0707781	benign
104	V	C	0.185551	0.0586757	benign
104	V	*	-1.44724	0.088104	pathogenic
104	V	Y	0.0107104	0.0668124	benign
104	V	N	-0.0815324	0.0691083	benign
104	V	G	-0.0617311	0.0570275	benign
104	V	A	0.0456398	0.0509434	benign
104	V	E	-0.250576	0.0619263	benign
104	V	D	-0.115876	0.0588934	benign
104	V	L	0.072468	0.0545541	benign
104	V	P	-0.250685	0.0692507	benign
104	V	Q	-0.0743553	0.0579182	benign
104	V	H	0.00958066	0.0589467	benign
104	V	M	0.0448441	0.0605199	benign
104	V	I	-0.0312814	0.0553295	benign
104	V	S	0.0452806	0.0586798	benign
104	V	R	-0.0843201	0.0548941	benign
104	V	T	0.166304	0.0581865	benign
104	V	W	-0.0166445	0.0561802	benign
104	V	F	-0.1297	0.0421385	benign
105	S	*	-1.24093	0.0907001	pathogenic
105	S	W	0.0600029	0.0538875	benign
105	S	C	0.0533725	0.060183	benign
105	S	F	0.103968	0.0526086	benign
105	S	Y	0.0243908	0.0568717	benign
105	S	E	0.0640117	0.0610896	benign
105	S	G	0.112969	0.0451819	benign
105	S	N	0.0661916	0.0511881	benign
105	S	K	0.165952	0.0566164	benign
105	S	V	0.0697344	0.0523568	benign
105	S	R	0.105422	0.0492399	benign
105	S	I	0.166496	0.05101	benign
105	S	M	-0.00866813	0.130344	benign
105	S	T	0.102583	0.0566894	benign
105	S	Q	-0.0473358	0.0637131	benign
105	S	L	-0.0316607	0.0529413	benign
105	S	D	0.0803746	0.0519207	benign
105	S	A	0.13522	0.0543136	benign
105	S	H	-0.0424632	0.0633901	benign
105	S	P	-0.02093	0.0542194	benign
106	E	A	-0.012879	0.0535382	benign
106	E	F	-0.232775	0.0526211	benign
106	E	W	-0.146177	0.0575765	benign
106	E	C	-0.482132	0.0682344	benign
106	E	*	-1.21591	0.0932484	pathogenic
106	E	Y	-0.15566	0.054665	benign
106	E	V	-0.159593	0.0512968	benign
106	E	G	-0.103326	0.0641337	benign
106	E	H	-0.0275535	0.0564944	benign
106	E	K	-0.364982	0.0392116	benign
106	E	N	-0.0795989	0.061976	benign
106	E	T	-0.162104	0.0575744	benign
106	E	R	-0.237311	0.0640942	benign
106	E	S	-0.0314291	0.0561901	benign
106	E	I	-0.138545	0.0553335	benign
106	E	M	-0.188566	0.0684236	benign
106	E	Q	-0.109121	0.053842	benign
106	E	P	-0.0102667	0.0569562	benign
106	E	L	-0.149454	0.0532235	benign
106	E	D	0.00332484	0.0548797	benign
107	K	N	-0.0604851	0.0531932	benign
107	K	T	-0.0344159	0.0682508	benign
107	K	D	0.116459	0.056235	benign
107	K	E	-0.0962975	0.0602565	benign
107	K	I	0.0254097	0.0677374	benign
107	K	M	-0.0948558	0.056963	benign
107	K	H	0.0235772	0.0628326	benign
107	K	Q	0.0282818	0.053352	benign
107	K	P	0.000971702	0.054716	benign
107	K	F	-0.150801	0.0619999	benign
107	K	W	-0.175873	0.0542835	benign
107	K	C	-0.0744252	0.0541729	benign
107	K	*	-1.27378	0.0975636	pathogenic
107	K	V	-0.0951838	0.0604324	benign
107	K	L	-0.0129313	0.0545441	benign
107	K	A	0.0706798	0.0546928	benign
107	K	S	0.054986	0.0601952	benign
107	K	R	-0.115486	0.0529407	benign
107	K	G	0.0109577	0.0556474	benign
107	K	Y	-0.0834433	0.0612356	benign
109	I	P	-0.0309098	0.0680137	benign
109	I	L	-0.0956931	0.071195	benign
109	I	D	-0.290583	0.075042	benign
109	I	E	-0.493858	0.0737127	benign
109	I	A	0.0689106	0.0710132	benign
109	I	G	0.0214375	0.0599115	benign
109	I	V	-0.0377064	0.0720556	benign
109	I	*	-1.53997	0.14522	pathogenic
109	I	C	-0.266524	0.0676629	benign
109	I	W	-0.24857	0.0714284	benign
109	I	F	-0.519982	0.078227	benign
109	I	N	0.0857002	0.063405	benign
109	I	K	-0.0233056	0.0598386	benign
109	I	T	0.0735809	0.0742339	benign
109	I	R	-0.276714	0.0723598	benign
109	I	S	-0.039265	0.0667893	benign
109	I	M	-0.107174	0.0659889	benign
109	I	Q	-0.16517	0.0637681	benign
109	I	H	-0.10145	0.0691156	benign
109	I	Y	-0.353657	0.0721224	benign
110	G	N	-0.151885	0.0820142	benign
110	G	R	-0.318771	0.0362666	benign
110	G	S	0.0701632	0.059091	benign
110	G	I	-0.740105	0.102735	pathogenic
110	G	M	-0.219541	0.0559238	benign
110	G	H	-0.104839	0.0769277	benign
110	G	Q	-0.0906146	0.0601746	benign
110	G	P	-0.304951	0.0984402	benign
110	G	L	-0.283386	0.0651548	benign
110	G	D	-0.362877	0.0704418	benign
110	G	E	-0.091168	0.0625306	benign
110	G	A	-0.0400234	0.075148	benign
110	G	T	-0.195448	0.0998767	benign
110	G	K	-0.204257	0.0574295	benign
110	G	F	-0.476645	0.079261	benign
110	G	W	-0.330472	0.050256	benign
110	G	C	-0.0366574	0.0749778	benign
110	G	*	-0.540229	0.0364619	benign
110	G	Y	-0.285605	0.0799233	benign
110	G	V	-0.379556	0.0526935	benign
111	L	S	0.207452	0.0763895	benign
111	L	K	-0.136472	0.0825035	benign
111	L	N	-0.0013065	0.0833824	benign
111	L	I	-0.0388511	0.0740699	benign
111	L	M	-0.17899	0.0456161	benign
111	L	H	0.0436127	0.0595294	benign
111	L	Q	-0.135369	0.0651349	benign
111	L	P	0.152946	0.0675925	benign
111	L	R	-0.0494083	0.0842731	benign
111	L	T	-0.0469419	0.0716049	benign
111	L	C	-0.0720406	0.0626254	benign
111	L	W	0.0472676	0.056731	benign
111	L	F	0.110769	0.0715373	benign
111	L	Y	0.0304577	0.0594742	benign
111	L	V	0.00526416	0.0734587	benign
111	L	G	0.118627	0.0872212	benign
111	L	A	-0.0114696	0.0622021	benign
111	L	E	-0.00954078	0.0923896	benign
111	L	D	-0.0902048	0.0868737	benign
111	L	*	-1.31107	0.144321	pathogenic
112	M	H	0.0675416	0.0635431	benign
112	M	R	-0.118246	0.053483	benign
112	M	T	0.0954549	0.0569326	benign
112	M	K	-0.0997143	0.0607779	benign
112	M	N	0.0635677	0.056285	benign
112	M	F	0.053246	0.0562685	benign
112	M	C	-0.0513149	0.0613827	benign
112	M	S	0.0582468	0.0530511	benign
112	M	*	-1.46475	0.0856147	pathogenic
112	M	Y	0.12915	0.062232	benign
112	M	V	-0.0289215	0.050368	benign
112	M	A	-0.0454446	0.0629381	benign
112	M	E	-0.0813128	0.0613488	benign
112	M	D	-0.19574	0.0675748	benign
112	M	L	-0.0454125	0.0609404	benign
112	M	P	-0.0248241	0.0602484	benign
112	M	Q	0.0323086	0.0607549	benign
112	M	W	-0.00648114	0.0557231	benign
112	M	I	-0.0504231	0.0592735	benign
112	M	G	0.0467461	0.0535235	benign
113	R	M	-0.386901	0.0695	benign
113	R	I	-0.271738	0.0600522	benign
113	R	P	-0.595776	0.0687653	benign
113	R	S	-0.260364	0.067639	benign
113	R	T	-0.243272	0.0570381	benign
113	R	K	0.120033	0.0466742	benign
113	R	N	-0.20355	0.0605768	benign
113	R	L	-0.230808	0.0502596	benign
113	R	E	-0.505412	0.0600585	benign
113	R	A	-0.347215	0.0627035	benign
113	R	D	-0.487229	0.0653363	benign
113	R	V	-0.306587	0.0591132	benign
113	R	Y	-0.488295	0.0572584	benign
113	R	*	-0.885532	0.0504262	pathogenic
113	R	C	-0.331001	0.0572961	benign
113	R	W	-0.482309	0.0497629	benign
113	R	F	-0.628267	0.0646955	pathogenic
113	R	H	-0.197527	0.0551319	benign
113	R	Q	-0.0695682	0.0526727	benign
113	R	G	-0.315511	0.0601753	benign
114	M	H	-0.102135	0.0505495	benign
114	M	N	-0.237039	0.0752557	benign
114	M	R	-0.846673	0.125613	pathogenic
114	M	S	-0.282692	0.0597567	benign
114	M	I	-0.00350056	0.0525288	benign
114	M	Q	-0.339608	0.0571202	benign
114	M	D	-0.980821	0.072052	pathogenic
114	M	L	-0.045392	0.0439357	benign
114	M	F	0.0361055	0.0535637	benign
114	M	W	-0.52802	0.0558713	benign
114	M	C	-0.0907241	0.0492338	benign
114	M	*	-1.36957	0.154869	pathogenic
114	M	Y	-0.0512969	0.0460316	benign
114	M	V	-0.0467285	0.0454243	benign
114	M	G	-0.776514	0.0560551	pathogenic
114	M	A	-0.203542	0.0532277	benign
114	M	P	-0.89151	0.0822295	pathogenic
114	M	E	-0.887941	0.0703049	pathogenic
114	M	K	-0.659726	0.0693008	pathogenic
114	M	T	0.0485591	0.0473419	benign
115	Q	N	0.0403276	0.157305	benign
115	Q	K	-0.131916	0.0478607	benign
115	Q	T	-0.122604	0.0915452	benign
115	Q	R	-0.106697	0.0799387	benign
115	Q	S	-0.0186449	0.0806963	benign
115	Q	I	-0.554968	0.226682	benign
115	Q	M	-0.349187	0.11091	benign
115	Q	H	-0.101548	0.0689946	benign
115	Q	P	-0.755798	0.0828149	pathogenic
115	Q	L	-0.171769	0.0553336	benign
115	Q	F	-0.346535	0.147334	benign
115	Q	C	-0.133777	0.0543338	benign
115	Q	*	-1.27143	0.0994367	pathogenic
115	Q	Y	-0.407514	0.0960069	benign
115	Q	W	-0.301693	0.0641622	benign
115	Q	G	0.0398708	0.0512924	benign
115	Q	A	0.0210812	0.052837	benign
115	Q	E	0.103999	0.0668612	benign
115	Q	D	-0.0186566	0.0844871	benign
115	Q	V	-0.245012	0.0544443	benign
117	W	H	-0.930853	0.0664923	pathogenic
117	W	Q	-1.38291	0.0747105	pathogenic
117	W	F	-0.324013	0.0610759	benign
117	W	C	-0.385142	0.125341	benign
117	W	Y	-0.140312	0.0792607	benign
117	W	V	-1.21066	0.0969642	pathogenic
117	W	G	-1.47662	0.268465	pathogenic
117	W	A	-0.541915	0.176325	benign
117	W	E	-1.19647	0.0884896	pathogenic
117	W	D	-0.706782	1.1894	pathogenic
117	W	*	-1.27873	0.0361934	pathogenic
117	W	P	-1.28418	0.0825515	pathogenic
117	W	L	-0.45307	0.052718	benign
117	W	M	-0.589793	0.058096	benign
117	W	S	-1.2925	0.0970433	pathogenic
117	W	R	-1.19566	0.0921681	pathogenic
117	W	I	-0.7309	0.054444	pathogenic
117	W	K	-1.36607	0.0812823	pathogenic
117	W	N	-1.42978	0.0809413	pathogenic
117	W	T	-1.27589	0.0722057	pathogenic
118	K	H	-0.168944	0.0503085	benign
118	K	A	-0.142693	0.042091	benign
118	K	M	-0.40959	0.046763	benign
118	K	I	-0.770272	0.0624657	pathogenic
118	K	S	-0.256735	0.0475199	benign
118	K	Q	-0.0889278	0.0565094	benign
118	K	E	-0.617012	0.0492527	pathogenic
118	K	G	-0.613654	0.0620779	pathogenic
118	K	C	-0.785518	0.0543577	pathogenic
118	K	Y	-0.556678	0.0556714	benign
118	K	*	-1.26717	0.0788079	pathogenic
118	K	N	-0.36467	0.0521355	benign
118	K	F	-0.916545	0.0574753	pathogenic
118	K	R	-0.116195	0.0436056	benign
118	K	P	-1.36283	0.075096	pathogenic
118	K	T	-0.516856	0.0497276	benign
118	K	V	-1.02024	0.0579578	pathogenic
118	K	L	-0.768324	0.0462005	pathogenic
118	K	W	-0.647495	0.0488609	pathogenic
118	K	D	-1.27513	0.0713506	pathogenic
119	K	C	-0.387725	0.0545049	benign
119	K	Y	-0.686858	0.0752697	pathogenic
119	K	V	-0.753003	0.066385	pathogenic
119	K	G	-0.306187	0.0425416	benign
119	K	A	-0.129772	0.0438519	benign
119	K	E	-0.0535467	0.0451886	benign
119	K	D	0.00167393	0.0434389	benign
119	K	W	-0.881147	0.0666993	pathogenic
119	K	H	-0.149648	0.0477618	benign
119	K	Q	-0.0309867	0.0458035	benign
119	K	M	-0.484942	0.0904868	benign
119	K	I	-0.986377	0.118292	pathogenic
119	K	S	-0.105893	0.0507123	benign
119	K	R	-0.0676729	0.0524386	benign
119	K	T	-0.116349	0.0744478	benign
119	K	N	-0.0868	0.0597195	benign
119	K	P	-1.21864	0.0902489	pathogenic
119	K	L	-0.76824	0.0590406	pathogenic
119	K	*	-1.51967	0.0812108	pathogenic
119	K	F	-1.0371	0.112643	pathogenic
120	T	E	-0.980517	0.0896925	pathogenic
120	T	Y	-0.0816434	0.0786296	benign
120	T	*	-1.45771	0.123033	pathogenic
120	T	C	0.0350903	0.0754387	benign
120	T	W	-0.141909	0.0695602	benign
120	T	F	-0.15362	0.123901	benign
120	T	R	-1.07538	0.0900692	pathogenic
120	T	I	0.177686	0.07558	benign
120	T	M	-0.0899869	0.0658162	benign
120	T	A	0.00810284	0.0822281	benign
120	T	Q	-0.243007	0.0831038	benign
120	T	P	-1.24834	0.177818	pathogenic
120	T	L	-0.333979	0.0501218	benign
120	T	D	-1.1455	0.155281	pathogenic
120	T	S	0.010553	0.0756814	benign
120	T	K	-1.03449	0.0943445	pathogenic
120	T	V	-0.004492	0.0646007	benign
120	T	N	-1.13514	0.0406212	pathogenic
120	T	H	-0.362255	0.101486	benign
120	T	G	-0.276843	0.0821088	benign
121	V	F	-1.10902	0.15264	pathogenic
121	V	W	-1.67016	0.109662	pathogenic
121	V	C	-0.385167	0.0705867	benign
121	V	*	-1.1914	0.162827	pathogenic
121	V	Y	-1.20565	0.170888	pathogenic
121	V	A	-1.15531	0.117558	pathogenic
121	V	Q	-1.26567	0.160947	pathogenic
121	V	N	-1.28241	0.136228	pathogenic
121	V	K	-1.07513	0.153038	pathogenic
121	V	T	-1.01921	0.130601	pathogenic
121	V	R	-0.686965	0.140618	pathogenic
121	V	S	-1.39947	0.162875	pathogenic
121	V	I	0.0920122	0.0730071	benign
121	V	M	-0.31789	0.0550136	benign
121	V	H	-1.04051	0.153952	pathogenic
121	V	G	-1.29061	0.0927446	pathogenic
121	V	P	-1.50128	0.189534	pathogenic
121	V	L	-0.0952455	0.0682566	benign
121	V	D	-1.40308	0.113475	pathogenic
121	V	E	-0.736357	0.0767973	pathogenic
122	E	C	-0.154659	0.0685817	benign
122	E	*	-1.34046	0.0822355	pathogenic
122	E	F	-0.348894	0.0944443	benign
122	E	W	-0.277986	0.0533168	benign
122	E	Y	-0.193447	0.0683664	benign
122	E	H	0.025934	0.0644998	benign
122	E	G	-0.160546	0.0662096	benign
122	E	I	-0.0375406	0.094513	benign
122	E	S	-0.00351911	0.0735381	benign
122	E	L	0.0150199	0.0510864	benign
122	E	P	-1.17051	0.109669	pathogenic
122	E	Q	0.0683444	0.0511632	benign
122	E	T	-0.100797	0.0689457	benign
122	E	R	-0.0546461	0.0686184	benign
122	E	N	-0.0671384	0.0877115	benign
122	E	V	-0.294993	0.676278	benign
122	E	M	0.153267	0.078085	benign
122	E	D	0.107085	0.0553343	benign
122	E	A	0.100026	0.0653226	benign
122	E	K	-0.0411011	0.0723659	benign
123	D	Q	0.0599033	0.0601862	benign
123	D	A	-0.0566297	0.0540082	benign
123	D	E	-0.0486007	0.0648589	benign
123	D	L	-0.102074	0.175931	benign
123	D	H	-0.217023	0.0520375	benign
123	D	P	-1.45721	0.0836268	pathogenic
123	D	I	-1.24628	0.0762312	pathogenic
123	D	F	-0.589169	0.0612879	benign
123	D	W	-0.507324	0.0606022	benign
123	D	C	-0.280744	0.05315	benign
123	D	*	-1.35711	0.087794	pathogenic
123	D	Y	-0.471997	0.0528829	benign
123	D	V	-1.48333	0.591148	pathogenic
123	D	M	0.132135	0.118531	benign
123	D	N	-0.0922343	0.0493452	benign
123	D	K	-0.1359	0.0684171	benign
123	D	G	-0.197895	0.0558242	benign
123	D	T	-0.393318	0.0605279	benign
123	D	R	-0.142702	0.0521457	benign
123	D	S	-0.0433609	0.0553879	benign
124	I	R	-1.06159	0.0714815	pathogenic
124	I	T	-1.02883	0.056732	pathogenic
124	I	K	-1.30766	0.0722717	pathogenic
124	I	N	-1.32683	0.0757116	pathogenic
124	I	D	-1.36454	0.077531	pathogenic
124	I	M	-0.299159	0.0450843	benign
124	I	Q	-1.42388	0.0985484	pathogenic
124	I	P	-1.31151	0.0741923	pathogenic
124	I	L	-0.136714	0.0468445	benign
124	I	S	-1.10291	0.0598562	pathogenic
124	I	E	-1.39552	0.0674921	pathogenic
124	I	H	-1.30724	0.0825873	pathogenic
124	I	G	-1.40501	0.0745041	pathogenic
124	I	V	-0.0497257	0.0469978	benign
124	I	Y	-1.25435	0.105005	pathogenic
124	I	*	-1.44809	0.072287	pathogenic
124	I	C	-0.720597	0.0400202	pathogenic
124	I	W	-1.32464	0.0684612	pathogenic
124	I	F	-0.8548	0.058534	pathogenic
124	I	A	-0.479857	0.0455988	benign
125	Y	K	-1.24895	0.0662264	pathogenic
125	Y	T	-0.967653	0.055342	pathogenic
125	Y	R	-1.28335	0.075112	pathogenic
125	Y	S	-0.971478	0.0645568	pathogenic
125	Y	I	-0.903129	0.0566312	pathogenic
125	Y	M	-0.281302	0.0511868	benign
125	Y	P	-1.39891	0.0782893	pathogenic
125	Y	Q	-1.09203	0.0614187	pathogenic
125	Y	N	-0.666678	0.0533129	pathogenic
125	Y	L	-0.640873	0.0501197	pathogenic
125	Y	D	-0.458957	0.0509392	benign
125	Y	V	-1.07986	0.0576124	pathogenic
125	Y	G	-0.997821	0.0544248	pathogenic
125	Y	H	-0.545456	0.0516356	benign
125	Y	A	-0.845407	0.0550726	pathogenic
125	Y	E	-0.688996	0.0550077	pathogenic
125	Y	F	0.0325013	0.0397326	benign
125	Y	W	-0.189873	0.0448211	benign
125	Y	C	-0.385726	0.0430556	benign
125	Y	*	-1.32652	0.0852744	pathogenic
126	C	*	-0.748243	0.069322	pathogenic
126	C	N	0.0665428	0.0423963	benign
126	C	K	0.1325	0.0403577	benign
126	C	T	0.111877	0.0489705	benign
126	C	R	0.132261	0.0443719	benign
126	C	F	0.0751474	0.0559598	benign
126	C	I	0.0851142	0.0408278	benign
126	C	M	0.132408	0.041052	benign
126	C	H	0.09403	0.0421993	benign
126	C	S	0.087364	0.0422861	benign
126	C	Q	0.124225	0.0392824	benign
126	C	P	-1.31756	0.0810134	pathogenic
126	C	L	0.103974	0.0364926	benign
126	C	D	0.115112	0.039126	benign
126	C	E	0.0419593	0.0401099	benign
126	C	A	0.163883	0.0395536	benign
126	C	G	0.166587	0.0440406	benign
126	C	V	0.0862049	0.0395131	benign
126	C	W	-0.09665	0.0504426	benign
126	C	Y	0.137565	0.0633486	benign
127	D	I	-0.911017	0.0913918	pathogenic
127	D	S	-0.178482	0.073796	benign
127	D	R	-0.439644	0.0932349	benign
127	D	T	-0.372076	0.0738587	benign
127	D	K	-0.438705	0.0785566	benign
127	D	N	-0.230455	0.0499123	benign
127	D	Q	-0.293903	0.0573649	benign
127	D	H	-0.227951	0.0596515	benign
127	D	E	-0.176163	0.0648178	benign
127	D	A	-0.264356	0.0626178	benign
127	D	G	-0.118674	0.0495748	benign
127	D	Y	-0.617035	0.0354946	pathogenic
127	D	*	-1.31197	0.109934	pathogenic
127	D	V	-0.886582	0.0831535	pathogenic
127	D	W	-1.28843	0.104165	pathogenic
127	D	F	-1.18767	0.0901161	pathogenic
127	D	L	-1.11904	0.0901253	pathogenic
127	D	P	-0.956011	0.0846463	pathogenic
127	D	C	-0.423878	0.0682287	benign
127	D	M	-0.502502	0.0803748	benign
128	N	Y	-0.0415486	0.0602963	benign
128	N	W	-0.197787	0.0579635	benign
128	N	C	0.062006	0.0472868	benign
128	N	*	-1.17863	0.108696	pathogenic
128	N	G	-0.14785	0.0545492	benign
128	N	A	0.0940786	0.0440752	benign
128	N	E	-0.0649804	0.0454873	benign
128	N	D	-0.0679679	0.0487515	benign
128	N	L	0.00716905	0.0440522	benign
128	N	P	-0.866753	0.0705593	pathogenic
128	N	Q	0.0613551	0.0422437	benign
128	N	H	0.0301889	0.0474945	benign
128	N	M	0.0243899	0.0508284	benign
128	N	I	-0.00360034	0.0487004	benign
128	N	S	0.0605934	0.048755	benign
128	N	R	0.0568947	0.0550205	benign
128	N	T	0.128819	0.0525672	benign
128	N	K	0.0384244	0.0396193	benign
128	N	V	0.108944	0.0475298	benign
128	N	F	-0.0108898	0.0526634	benign
129	P	R	-0.119664	0.0537665	benign
129	P	Y	-0.172141	0.0529705	benign
129	P	E	-0.299359	0.0638899	benign
129	P	A	-0.121986	0.0522714	benign
129	P	G	-1.1248	0.105161	pathogenic
129	P	V	0.0488714	0.0517576	benign
129	P	M	0.0251262	0.0433601	benign
129	P	*	-1.31925	0.0827015	pathogenic
129	P	C	-0.0818323	0.0481748	benign
129	P	W	-0.662322	0.0716741	pathogenic
129	P	F	-0.118227	0.058506	benign
129	P	N	-1.0378	0.0961257	pathogenic
129	P	K	-0.0468912	0.0371535	benign
129	P	T	-0.240803	0.0524599	benign
129	P	S	-0.510943	0.0565649	benign
129	P	Q	-0.188711	0.0506475	benign
129	P	H	-0.441507	0.0695213	benign
129	P	D	-1.04589	0.10945	pathogenic
129	P	L	-0.215028	0.0508406	benign
129	P	I	0.00491508	0.0491187	benign
130	P	V	0.0166928	0.0412213	benign
130	P	E	-0.732355	0.0477982	pathogenic
130	P	D	-0.505567	0.0520703	benign
130	P	L	-0.181642	0.0579874	benign
130	P	Y	-0.768473	0.078602	pathogenic
130	P	*	-1.43838	0.083402	pathogenic
130	P	C	-0.19088	0.0461187	benign
130	P	W	-0.920903	0.067548	pathogenic
130	P	F	-0.942727	0.0636947	pathogenic
130	P	A	-0.064562	0.0508142	benign
130	P	T	-0.171864	0.0607949	benign
130	P	S	-0.0886113	0.047598	benign
130	P	I	-0.159019	0.0614407	benign
130	P	M	-0.37023	0.0523761	benign
130	P	H	-0.329964	0.0629099	benign
130	P	Q	-0.217809	0.0477987	benign
130	P	R	-0.431348	0.0643374	benign
130	P	G	0.0226867	0.0414405	benign
130	P	N	-0.199002	0.0762356	benign
130	P	K	-0.718147	0.0702046	pathogenic
131	H	P	0.0102137	0.0512634	benign
131	H	L	0.0228165	0.0591007	benign
131	H	D	-0.0258663	0.0532478	benign
131	H	E	0.00256011	0.0618137	benign
131	H	A	0.0512913	0.0554634	benign
131	H	G	-0.0211388	0.0480694	benign
131	H	V	0.0211674	0.0580181	benign
131	H	Y	0.076175	0.0598735	benign
131	H	C	-0.0101934	0.0530594	benign
131	H	*	-1.3588	0.114041	pathogenic
131	H	F	0.0913825	0.0481064	benign
131	H	N	-0.00564743	0.0565757	benign
131	H	K	0.032123	0.0627563	benign
131	H	T	0.0784135	0.0790811	benign
131	H	R	-0.0288535	0.0650011	benign
131	H	S	0.205229	0.0575618	benign
131	H	I	0.092871	0.0556344	benign
131	H	M	0.0751496	0.0592907	benign
131	H	Q	-0.138366	0.064278	benign
131	H	W	-0.0454239	0.0634906	benign
132	Q	Y	0.0805465	0.0404331	benign
132	Q	F	0.0309532	0.0397438	benign
132	Q	W	0.0179059	0.0474371	benign
132	Q	C	-0.12842	0.0409647	benign
132	Q	*	-1.28914	0.0666564	pathogenic
132	Q	V	0.0683735	0.0427894	benign
132	Q	T	0.00511028	0.038875	benign
132	Q	A	-0.0195753	0.0391217	benign
132	Q	K	-0.303899	0.0333774	benign
132	Q	N	-0.0113021	0.0388927	benign
132	Q	S	0.0726973	0.0387578	benign
132	Q	I	-0.0517179	0.0393009	benign
132	Q	M	0.01817	0.0394567	benign
132	Q	H	-0.0274302	0.0368502	benign
132	Q	G	0.0872807	0.0493326	benign
132	Q	D	-0.204387	0.0421763	benign
132	Q	P	-0.633299	0.0468227	pathogenic
132	Q	L	0.0652995	0.0406609	benign
132	Q	R	-0.171965	0.0443988	benign
132	Q	E	0.0179163	0.0425579	benign
133	P	R	-0.200858	0.0432784	benign
133	P	I	-0.426578	0.0417278	benign
133	P	K	-0.112907	0.0517908	benign
133	P	N	-0.260357	0.0407168	benign
133	P	M	-0.330214	0.0634144	benign
133	P	H	0.0858476	0.0346726	benign
133	P	Q	-0.170393	0.0512055	benign
133	P	S	-0.192364	0.0425236	benign
133	P	T	-0.232515	0.0362196	benign
133	P	G	-0.324446	0.0401745	benign
133	P	F	-0.332397	0.0374654	benign
133	P	W	-0.470596	0.0528311	benign
133	P	C	-0.159529	0.0494103	benign
133	P	*	-1.14916	0.0759954	pathogenic
133	P	Y	-0.380618	0.0413288	benign
133	P	V	-0.251962	0.0767604	benign
133	P	A	0.100036	0.0403941	benign
133	P	E	-0.209428	0.0765606	benign
133	P	D	-0.395144	0.106924	benign
133	P	L	-0.494072	0.0607286	benign
134	V	K	-1.28783	0.109751	pathogenic
134	V	T	0.0328155	0.0676207	benign
134	V	R	-1.24413	0.0850757	pathogenic
134	V	G	-0.731598	0.0834769	pathogenic
134	V	A	-0.13284	0.0787815	benign
134	V	E	-0.77729	0.0655482	pathogenic
134	V	H	-1.03446	0.106294	pathogenic
134	V	L	-0.00764501	0.0494814	benign
134	V	P	-1.10065	0.115738	pathogenic
134	V	Q	-1.17644	0.0904228	pathogenic
134	V	N	-1.02436	0.123021	pathogenic
134	V	M	-0.282895	0.0445951	benign
134	V	D	-1.32437	0.134759	pathogenic
134	V	I	0.0564447	0.0639871	benign
134	V	S	-0.361949	0.0823837	benign
134	V	F	-1.06446	0.118641	pathogenic
134	V	W	-1.14582	0.0959514	pathogenic
134	V	C	0.0430226	0.0639793	benign
134	V	*	-1.29055	0.0795932	pathogenic
134	V	Y	-1.24381	0.118487	pathogenic
135	A	D	-0.440821	0.0385463	benign
135	A	Q	-1.13803	0.0584865	pathogenic
135	A	E	-1.38807	0.0827509	pathogenic
135	A	H	-1.28177	0.0929621	pathogenic
135	A	M	-0.851015	0.0803403	pathogenic
135	A	I	-0.725165	0.0719434	pathogenic
135	A	S	-0.217154	0.0598774	benign
135	A	R	-1.2416	0.0944223	pathogenic
135	A	T	-0.505951	0.0593461	benign
135	A	G	-0.0101319	0.0551096	benign
135	A	V	-0.694586	0.0906854	pathogenic
135	A	L	-1.14202	0.082795	pathogenic
135	A	K	-1.43026	0.103824	pathogenic
135	A	N	-1.55657	0.109177	pathogenic
135	A	*	-1.26903	0.0709861	pathogenic
135	A	C	-0.0984877	0.0521518	benign
135	A	W	-1.28986	0.110516	pathogenic
135	A	F	-0.730526	0.0840762	pathogenic
135	A	Y	-1.33799	0.103414	pathogenic
135	A	P	-0.255148	0.0641926	benign
136	I	*	-1.19399	0.0943583	pathogenic
136	I	N	-0.202234	0.0500276	benign
136	I	Y	-0.00635374	0.0481236	benign
136	I	V	0.0798662	0.0525538	benign
136	I	G	-0.919739	0.057448	pathogenic
136	I	A	-0.0793259	0.0537029	benign
136	I	E	-0.120336	0.0503286	benign
136	I	D	-1.16775	0.0579648	pathogenic
136	I	L	0.113872	0.0428636	benign
136	I	C	-0.0493296	0.0474165	benign
136	I	P	-1.44018	0.0801091	pathogenic
136	I	H	0.0628901	0.0438423	benign
136	I	F	0.00954731	0.0478769	benign
136	I	M	-0.03931	0.0505163	benign
136	I	S	-0.29255	0.0580165	benign
136	I	R	0.0597684	0.0454607	benign
136	I	T	-0.0524564	0.0484953	benign
136	I	K	0.0885076	0.0418428	benign
136	I	W	-0.0301352	0.0527613	benign
136	I	Q	0.0230406	0.0414467	benign
137	E	C	-0.27762	0.0601362	benign
137	E	K	-0.733888	0.0490195	pathogenic
137	E	N	-0.0479087	0.0602305	benign
137	E	*	-1.27686	0.088114	pathogenic
137	E	D	-0.267449	0.0557286	benign
137	E	A	0.0895486	0.0552687	benign
137	E	G	-0.19912	0.095554	benign
137	E	V	-1.24224	0.0760985	pathogenic
137	E	Y	-0.999739	0.0892869	pathogenic
137	E	F	-1.2444	0.0876991	pathogenic
137	E	W	-0.871734	0.0745992	pathogenic
137	E	P	-0.85503	0.0635344	pathogenic
137	E	Q	-0.0134285	0.0331585	benign
137	E	H	-0.405193	0.0580788	benign
137	E	M	-0.372636	0.0439098	benign
137	E	I	-1.26278	0.10623	pathogenic
137	E	S	-0.166426	0.0486806	benign
137	E	R	-0.746483	0.064429	pathogenic
137	E	T	-0.979086	0.0738992	pathogenic
137	E	L	-0.77308	0.0479731	pathogenic
138	L	D	-1.24482	0.0973287	pathogenic
138	L	C	-0.927058	0.108666	pathogenic
138	L	F	-1.28085	0.0793616	pathogenic
138	L	W	-1.5507	0.126086	pathogenic
138	L	*	-1.57968	0.126325	pathogenic
138	L	P	-1.18198	0.128195	pathogenic
138	L	V	-0.0341343	0.0597037	benign
138	L	G	-1.23718	0.104865	pathogenic
138	L	A	-1.46114	0.134426	pathogenic
138	L	E	-1.19406	0.119655	pathogenic
138	L	H	-1.21767	0.115784	pathogenic
138	L	M	-0.0223368	0.0670706	benign
138	L	I	-0.133512	0.0561691	benign
138	L	S	-1.61717	0.152979	pathogenic
138	L	R	-1.20488	0.125477	pathogenic
138	L	T	-1.0292	0.101856	pathogenic
138	L	K	-1.19981	0.127276	pathogenic
138	L	N	-1.4436	0.118969	pathogenic
138	L	Y	-1.39312	0.101836	pathogenic
138	L	Q	-1.48046	0.120992	pathogenic
139	W	N	-0.440276	0.057731	benign
139	W	F	-0.0831845	0.0542112	benign
139	W	K	-1.06233	0.0723637	pathogenic
139	W	I	-1.16633	0.0770646	pathogenic
139	W	Y	0.0720907	0.0512664	benign
139	W	*	-1.2725	0.0392362	pathogenic
139	W	C	-0.117857	0.0567623	benign
139	W	A	-0.172675	0.0819691	benign
139	W	E	-0.943514	0.0708295	pathogenic
139	W	D	-1.0816	0.0711455	pathogenic
139	W	L	-0.503268	0.0750186	benign
139	W	P	-1.30755	0.130482	pathogenic
139	W	Q	-0.383804	0.0688219	benign
139	W	H	0.0442574	0.0627342	benign
139	W	M	-0.235136	0.0556539	benign
139	W	S	-0.178362	0.0592956	benign
139	W	R	-0.740935	0.0669781	pathogenic
139	W	T	-0.410566	0.0863276	benign
139	W	V	-1.04287	0.0676557	pathogenic
139	W	G	-0.555218	0.0975011	benign
140	K	*	-1.4277	0.0847664	pathogenic
140	K	M	-0.514581	0.0539301	benign
140	K	H	-0.238142	0.0697432	benign
140	K	Q	-0.281687	0.0726589	benign
140	K	P	-1.26841	0.199045	pathogenic
140	K	L	-1.06143	0.110668	pathogenic
140	K	D	-1.31611	0.0972799	pathogenic
140	K	I	-1.21484	0.0870696	pathogenic
140	K	E	-0.520662	0.0443278	benign
140	K	G	-0.979908	0.0688983	pathogenic
140	K	V	-1.40795	0.129892	pathogenic
140	K	Y	-0.730522	0.0949761	pathogenic
140	K	W	-1.21744	0.113313	pathogenic
140	K	F	-1.2136	0.101222	pathogenic
140	K	N	-0.235515	0.0568457	benign
140	K	A	-1.02011	0.0907857	pathogenic
140	K	S	-0.697237	0.0656464	pathogenic
140	K	C	-0.944823	0.0823693	pathogenic
140	K	T	-0.859028	0.105529	pathogenic
140	K	R	0.0191608	0.0377207	benign
141	A	E	-1.20013	0.077865	pathogenic
141	A	P	-1.47269	0.110524	pathogenic
141	A	Q	-1.37717	0.226491	pathogenic
141	A	H	-1.30934	0.124431	pathogenic
141	A	M	-0.843527	0.0671393	pathogenic
141	A	S	-0.115711	0.0534661	benign
141	A	R	-1.3049	0.070479	pathogenic
141	A	T	0.0807796	0.0625188	benign
141	A	K	-1.34331	0.0875674	pathogenic
141	A	N	-1.27562	0.0956779	pathogenic
141	A	D	-1.31837	0.0697609	pathogenic
141	A	I	-0.630286	0.0538633	pathogenic
141	A	L	-1.37473	0.133877	pathogenic
141	A	W	-1.2352	0.112288	pathogenic
141	A	C	0.0849563	0.0528994	benign
141	A	*	-1.27718	0.0743875	pathogenic
141	A	Y	-1.52947	0.183013	pathogenic
141	A	G	-0.684593	0.0721957	pathogenic
141	A	V	-0.233256	0.0499168	benign
141	A	F	-1.44711	0.0949429	pathogenic
142	V	R	-0.363091	0.0528414	benign
142	V	Q	-0.587242	0.0521594	benign
142	V	T	-0.1263	0.0568643	benign
142	V	K	-0.0927213	0.045379	benign
142	V	N	-0.523393	0.07431	benign
142	V	I	-0.0639899	0.0421525	benign
142	V	M	-0.185075	0.0611909	benign
142	V	H	-0.264118	0.0473033	benign
142	V	S	-0.776035	0.0785912	pathogenic
142	V	P	-1.54399	0.105714	pathogenic
142	V	Y	-0.468399	0.0623998	benign
142	V	D	-1.16877	0.198068	pathogenic
142	V	A	-0.234666	0.0723303	benign
142	V	G	-1.05988	0.118122	pathogenic
142	V	F	-0.688333	0.0637729	pathogenic
142	V	W	-0.50363	0.0600824	benign
142	V	C	-0.0466728	0.0520428	benign
142	V	*	-1.24676	0.0884349	pathogenic
142	V	L	-0.434852	0.0518072	benign
142	V	E	-0.920975	0.151139	pathogenic
143	K	S	-0.199184	0.0464133	benign
143	K	T	-0.0697798	0.0631845	benign
143	K	R	-0.0857487	0.0476469	benign
143	K	C	-0.117176	0.0597222	benign
143	K	M	-0.259123	0.102645	benign
143	K	H	-0.0356433	0.0543267	benign
143	K	Q	0.0144208	0.0384944	benign
143	K	P	-1.38207	0.110471	pathogenic
143	K	*	-1.13254	0.119409	pathogenic
143	K	D	-0.991791	0.10178	pathogenic
143	K	E	-0.788743	0.117095	pathogenic
143	K	A	-0.207792	0.0439652	benign
143	K	G	-0.399306	0.067845	benign
143	K	V	-0.0674715	0.0710193	benign
143	K	Y	-0.388868	0.0902463	benign
143	K	F	-0.614569	0.0567151	pathogenic
143	K	W	-0.31485	0.0785084	benign
143	K	I	-0.29407	0.0500997	benign
143	K	L	-0.487276	0.0783814	benign
143	K	N	-0.241259	0.0601261	benign
144	R	K	-0.0177255	0.0455958	benign
144	R	S	-0.139857	0.0389156	benign
144	R	I	-0.414458	0.081922	benign
144	R	M	-0.0471871	0.0705786	benign
144	R	H	-0.33517	0.105028	benign
144	R	Q	-0.0174946	0.0397978	benign
144	R	P	-1.54069	0.326544	pathogenic
144	R	L	-0.0847157	0.0640917	benign
144	R	D	-0.553005	0.0887783	benign
144	R	E	-0.141599	0.051806	benign
144	R	F	-0.410126	0.053723	benign
144	R	W	-0.683921	0.0574428	pathogenic
144	R	C	-0.310887	0.0417469	benign
144	R	*	-0.552428	0.071089	benign
144	R	Y	-0.146037	0.118526	benign
144	R	V	-0.291918	0.0616638	benign
144	R	G	-0.381365	0.043787	benign
144	R	N	-0.187486	0.101634	benign
144	R	A	-0.0508959	0.0464015	benign
144	R	T	-0.0885949	0.115809	benign
145	H	E	-0.922018	0.0769461	pathogenic
145	H	D	-0.408665	0.0886123	benign
145	H	A	-0.402895	0.0470442	benign
145	H	G	-0.534553	0.0571838	benign
145	H	V	-0.955389	0.0915614	pathogenic
145	H	Y	0.0866436	0.0845165	benign
145	H	*	-1.26619	0.132221	pathogenic
145	H	C	-0.124908	0.0543343	benign
145	H	W	-0.179357	0.0426253	benign
145	H	F	0.112538	0.0896084	benign
145	H	P	-1.39076	0.0766391	pathogenic
145	H	Q	-0.574366	0.0528197	benign
145	H	M	-0.704789	0.0792229	pathogenic
145	H	I	-1.02878	0.145947	pathogenic
145	H	S	-0.179329	0.0457708	benign
145	H	R	-0.630965	0.0794358	pathogenic
145	H	T	-0.750831	0.0836725	pathogenic
145	H	K	-0.615271	0.06764	pathogenic
145	H	N	-0.100988	0.0626834	benign
145	H	L	-0.884087	0.0733095	pathogenic
146	N	K	-0.0365945	0.0338312	benign
146	N	V	-0.273452	0.0423815	benign
146	N	W	-0.568667	0.0480086	benign
146	N	P	-0.856708	0.0746996	pathogenic
146	N	L	-0.247479	0.0403754	benign
146	N	M	-0.0766579	0.04148	benign
146	N	F	-0.27428	0.0491138	benign
146	N	I	-0.604536	0.0681599	pathogenic
146	N	S	-0.033074	0.0378483	benign
146	N	R	-0.00169978	0.0466031	benign
146	N	Q	0.051398	0.0375351	benign
146	N	D	0.0102147	0.041567	benign
146	N	A	-0.0268827	0.038756	benign
146	N	G	0.035951	0.0380857	benign
146	N	T	0.013543	0.0469289	benign
146	N	Y	-0.243149	0.0605612	benign
146	N	*	-1.36811	0.0796915	pathogenic
146	N	C	-0.0496644	0.035345	benign
146	N	E	-0.105028	0.036307	benign
146	N	H	0.117954	0.050381	benign
147	L	*	-1.41812	0.125141	pathogenic
[truncated: 3,715 more rows]

## Sheet: S2
Position	Conservation (ConSurf)	SASA (%)	SASA (Å^2)	Mutational Sensitivity	Alpha Helix
45	4	0.86	148.2	0	FALSE
46	1	0.83	138	0	FALSE
47	4	0.76	82.3	0	FALSE
48	4	0.75	77.6	0	FALSE
49	4	0.91	107.1	0	FALSE
50	4	0.84	111.6	0	FALSE
51	2	0.9	69.4	0	FALSE
52	1	1	129.2	0	FALSE
53	2	0.77	63.4	0	FALSE
54	1	0.99	111.5	0	FALSE
55	1	0.74	184.7	0	FALSE
56	4	0.47	36.9	0	FALSE
57	4	0.26	39.6	0	TRUE
58	1	0.59	88.3	0	TRUE
59	2	0.34	61.2	0	TRUE
60	7	0.43	93.8	0	TRUE
61	9	0.01	1.8	2	TRUE
62	4	0.3	50.8	0	TRUE
63	4	0.19	32.5	0	TRUE
64	6	0.13	24	1	TRUE
65	8	0	0	4	TRUE
66	7	0.5	111.6	1	TRUE
67	5	0.81	146.3	0	TRUE
68	5	0.7	165.7	0	TRUE
69	9	0.25	34	7	FALSE
70	7	0.43	96.9	0	TRUE
71	8	0.37	65.3	1	TRUE
72	8	0.04	3.3	0	TRUE
73	6	0.16	37.1	7	TRUE
74	7	0.11	19.6	5	TRUE
75	6	0.05	6.2	1	TRUE
76	6	0	0.3	3	TRUE
77	7	0.4	69.5	5	TRUE
78	8	0.25	47.9	2	TRUE
79	6	0.05	7.6	1	FALSE
80	7	0.39	48	3	FALSE
81	1	0.6	67.8	0	TRUE
82	2	0.7	120.9	0	TRUE
83	3	0.05	6	0	TRUE
84	7	0.37	89.6	2	TRUE
85	4	0.38	48.8	0	TRUE
86	5	0.03	3.3	3	TRUE
87	6	0	0.7	2	TRUE
88	6	0.07	17	1	TRUE
89	8	0	0.2	7	TRUE
90	7	0	0.2	6	TRUE
91	9	0.05	13.6	3	TRUE
92	9	0	0	5	TRUE
93	8	0	0.6	7	TRUE
94	9	0.09	12	2	TRUE
95	7	0.06	9.4	2	TRUE
96	9	0.22	40.4	1	TRUE
97	7	0.01	2	5	TRUE
98	8	0.36	38.6	1	TRUE
99	5	0.3	56.4	0	TRUE
100	7	0.02	4.5	0	TRUE
101	6	0.25	49.8	0	TRUE
102	7	0.47	74	0	TRUE
103	5	0.57	65.6	0	TRUE
104	7	0.21	27.1	0	FALSE
105	8	0.91	103.9	0	FALSE
106	6	0.68	109.5	0	FALSE
107	2	0.48	100.1	0	TRUE
109	6	0.39	66.8	0	TRUE
110	7	0	0.2	0	TRUE
111	4	0.3	57.8	0	TRUE
112	8	0.6	117.4	0	TRUE
113	9	0.33	77	0	TRUE
114	7	0.01	1.5	2	TRUE
115	7	0.48	90.5	0	TRUE
117	9	0.06	12.4	5	TRUE
118	6	0.18	38	2	TRUE
119	7	0.61	126.7	2	TRUE
120	6	0.02	2.3	3	TRUE
121	5	0	1	6	TRUE
122	5	0.4	70.8	0	TRUE
123	3	0.23	37.7	1	TRUE
124	6	0.03	4.8	7	TRUE
125	5	0.34	77.3	5	TRUE
126	3	0.69	95.7	0	TRUE
127	4	0.47	81.6	3	FALSE
128	3	0.69	99.2	0	FALSE
129	5	0.25	28.9	1	FALSE
130	7	0.25	32.7	1	FALSE
131	4	0.88	186.6	0	FALSE
132	8	0.17	28	0	FALSE
133	8	0.29	40.2	0	TRUE
134	8	0	0	5	TRUE
135	6	0	0	5	TRUE
136	4	0.24	40.5	1	TRUE
137	7	0.08	14.3	3	TRUE
138	9	0	0.6	8	TRUE
139	4	0.29	68.7	3	TRUE
140	4	0.47	86.8	5	TRUE
141	7	0.01	0.3	6	TRUE
142	5	0.09	14	2	TRUE
143	4	0.59	123.9	1	TRUE
144	1	0.69	144.1	0	TRUE
145	5	0.25	40.7	2	TRUE
146	4	0.84	127.9	0	FALSE
147	7	0.03	4.9	6	FALSE
148	8	0.34	49.3	2	FALSE
149	7	0.3	63	1	TRUE
150	4	0.73	135.8	0	TRUE
151	7	0.16	37.7	1	TRUE
152	6	0	0.9	7	TRUE
153	5	0.2	36.2	0	TRUE
154	8	0.28	58.5	0	TRUE
155	7	0	0	3	TRUE
156	7	0	0	5	TRUE
157	5	0.31	51.2	0	TRUE
158	8	0.15	28.1	1	TRUE
159	9	0.14	30.9	1	TRUE
160	7	0.2	38.6	0	TRUE
161	4	0.63	132.8	0	TRUE
162	5	0.19	29.6	0	TRUE
163	7	0.11	19	0	TRUE
164	2	0.4	62.3	0	TRUE
165	4	0.35	57.8	0	FALSE
166	3	0.68	138.8	0	FALSE
167	2	0.32	32.9	0	FALSE
168	7	0.1	25	3	FALSE
169	2	0.72	173.1	0	FALSE
170	5	0.39	53.7	2	FALSE
171	4	0.17	30.9	3	TRUE
172	4	0.53	102.1	0	TRUE
173	4	0.26	53.4	4	TRUE
174	7	0.01	1.5	7	TRUE
175	8	0.11	20.1	5	TRUE
176	3	0.43	69.1	0	TRUE
177	9	0.13	28.8	1	TRUE
178	7	0	0	8	TRUE
179	9	0.18	29.6	6	TRUE
180	6	0.2	29.2	0	TRUE
181	8	0.01	0.8	5	TRUE
182	5	0.1	18.5	0	TRUE
183	9	0	0	6	TRUE
184	8	0	0	1	TRUE
185	5	0.03	5.3	5	TRUE
186	5	0.02	3.3	3	TRUE
187	8	0.07	18.8	4	TRUE
188	7	0	0	4	TRUE
189	6	0.03	3.9	2	TRUE
190	9	0.01	1.2	8	TRUE
191	7	0.21	41.3	4	TRUE
192	4	0.04	5.9	5	TRUE
193	5	0.19	33	6	TRUE
194	7	0.73	65	4	FALSE
195	6	0.11	16.8	4	FALSE
196	3	0.96	201.6	0	FALSE
197	7	0.25	37.3	5	FALSE
198	5	0.69	113.3	0	TRUE
199	4	0.37	69.9	0	TRUE
200	7	0.01	0.4	7	TRUE
201	8	0.39	62.2	0	TRUE
202	9	0.39	79.7	0	TRUE
203	7	0	0	7	TRUE
204	9	0	0	8	TRUE
205	9	0.11	15.3	3	TRUE
206	9	0.2	41	4	TRUE
207	7	0	0	7	TRUE
208	9	0	0	9	TRUE
209	8	0.15	30.5	5	TRUE
210	8	0.01	0.4	7	TRUE
211	7	0.16	29.5	0	TRUE
212	8	0.07	7.2	8	TRUE
213	7	0	0	6	TRUE
214	5	0.03	4.6	4	TRUE
215	7	0.49	68.1	0	TRUE
216	6	0.13	18.5	1	TRUE
217	8	0	0	7	TRUE
218	9	0.44	106.3	2	TRUE
219	8	0.2	21.4	1	TRUE
220	6	0.1	13.6	3	TRUE
221	6	0.15	20.8	0	TRUE
222	4	0.45	92.5	0	TRUE
223	7	0.23	42.1	1	TRUE
224	6	0.1	10.8	0	TRUE
225	4	0.64	81	0	TRUE
226	4	0.51	117.1	0	TRUE
227	6	0.6	144.1	0	FALSE
228	4	0.39	76.9	0	FALSE
229	6	0.12	17.9	1	FALSE
230	4	0.12	23.5	0	FALSE
231	7	0	1.4	7	FALSE
232	9	0	0	8	FALSE
233	5	0.22	43.8	1	TRUE
234	5	0.39	56.5	7	TRUE
235	5	0.1	16.2	1	TRUE
236	8	0.01	0.8	5	TRUE
237	7	0.73	145.4	0	TRUE
238	6	0.8	125.5	0	TRUE
239	8	0.25	44.7	6	TRUE
240	4	0.73	66.2	2	FALSE
241	7	0.09	11.9	6	FALSE
242	7	0.48	50.7	4	FALSE
243	7	0.38	74.5	2	TRUE
244	8	0.33	62.8	5	TRUE
245	5	0.24	38.3	0	TRUE
246	6	0.02	4	5	TRUE
247	5	0.18	35.2	2	TRUE
248	8	0.75	174.9	1	TRUE
249	2	0.58	136.2	0	FALSE
250	4	0.23	36.8	0	FALSE
251	3	0.55	100.1	0	FALSE
252	6	0.58	88.2	0	FALSE
253	3	0.62	126.2	0	TRUE
254	3	0.47	74.3	1	TRUE
255	5	0.04	5.5	1	TRUE
256	3	0.29	67.9	5	TRUE
257	6	0.22	38.2	1	TRUE
258	8	0	0	6	TRUE
259	7	0	0.1	6	TRUE
260	7	0.51	110	0	TRUE
261	5	0.28	41.1	0	TRUE
262	6	0	0.6	6	TRUE
263	9	0.03	3.8	4	TRUE
264	8	0.27	33.5	0	TRUE
265	4	0.33	61.7	0	TRUE
266	9	0	0	7	TRUE
267	7	0.58	105.2	0	TRUE
268	5	0.42	74.9	0	TRUE
269	9	0.1	17.5	7	TRUE
270	8	0.04	6.7	8	TRUE
271	3	0.67	131.2	0	TRUE
272	8	0.46	88.9	0	TRUE
273	9	0	0.8	8	TRUE
274	8	0.34	80.5	6	TRUE
275	6	0.74	83.6	0	TRUE
276	7	0.23	48.9	0	TRUE
277	3	0.34	64.8	0	TRUE
278	3	0.96	193.7	0	TRUE
279	2	0.5	71	0	TRUE
280	7	0.05	6.9	6	FALSE
281	6	0.39	47.6	5	FALSE
282	1	0.5	81	0	TRUE
283	1	0.76	162.8	0	TRUE
284	7	0	0	7	TRUE
285	3	0.05	11.6	1	TRUE
286	4	0.21	29.6	0	TRUE
287	8	0.06	5.2	5	TRUE
288	8	0	0	8	TRUE
289	8	0.02	2.1	1	TRUE
290	4	0.07	12.9	0	TRUE
291	7	0.01	1.9	5	TRUE
292	7	0.16	24.3	1	TRUE
293	4	0.12	13.9	0	TRUE
294	6	0.05	8.7	3	TRUE
295	4	0.3	53.4	0	TRUE
296	3	0.24	38.5	0	TRUE
297	6	0.05	11.3	3	TRUE
298	9	0.13	20.5	6	TRUE
299	4	0.44	92.5	0	TRUE
300	6	0.23	45.4	1	TRUE
301	9	0	0.2	6	TRUE
302	6	0.64	116.7	0	TRUE
303	3	0.77	187.5	0	TRUE
304	4	0.17	26.1	1	TRUE
305	5	0.57	82.7	4	FALSE
306	9	0.13	28.8	6	FALSE
307	6	0.11	18.1	7	FALSE
308	6	0.03	5.3	6	FALSE
309	8	0.18	36.1	3	FALSE
310	6	0.38	67.7	5	FALSE
311	2	0.68	90.5	0	TRUE
312	5	0.3	36.7	0	TRUE
313	8	0.07	12.9	6	TRUE
314	4	0.67	118.4	0	TRUE
315	2	0.67	124.7	0	FALSE
316	6	0.83	172.1	0	FALSE
317	5	0.23	37.9	0	FALSE
318	3	0.84	123.2	0	FALSE
319	4	0.49	82.9	1	TRUE
320	7	0.07	12.6	3	TRUE
321	5	0.38	52.6	5	TRUE
322	3	0.54	90.4	3	TRUE
323	3	0.47	103.3	0	TRUE
324	5	0.02	2.9	3	TRUE
325	4	0.64	138	1	TRUE
326	4	0.36	60.4	1	TRUE
327	4	0.18	36.1	1	TRUE
329	4	0.8	191.5	1	TRUE
330	4	0.69	152.7	1	TRUE
331	5	0.59	123.3	0	FALSE
332	5	0.3	41.1	0	FALSE
333	9	0.03	9.3	7	FALSE

## Sheet: S3
Protein	Log2 fold-change [NDUFAF6-FLAG/WT]	-Log Student's t-test p-value [NDUFAF6-FLAG/WT]
NDUFS8	4.72925	6.05233
MRPS24	4.61296	4.95311
MRPS15	3.28502	4.90647
VWA8	3.24334	3.82704
MRPS5	2.94187	5.12682
FASTKD2	3.38323	4.99323
DNAJA3	2.83264	4.78711
MRPL4	3.91276	2.08576
PPOX	3.00395	2.84728
DAP3	2.33622	4.17426
MRPS35	3.11481	2.50104
MRPL50	3.35866	2.13054
MRPS14	3.60306	3.97149
NDUFAF6	9.7231	9.21997
ERAL1	3.19251	3.24513
MRPL9	2.51952	2.56031
POLRMT	3.06666	1.83049
COQ8B	4.0786	6.07317
MRPL44	3.80984	3.73964
MRPL57	2.43086	3.55892
MRPS10	2.56768	2.82478
MRPS21	2.83285	2.27927
RPL22L1	2.90921	5.58226
HSPD1	2.22694	4.70726
MRPS33	2.30188	4.14145
C2orf42	2.22384	4.39437
REV3L	2.42475	3.81556
L2HGDH	3.61615	5.65676
MRPS23	2.6186	2.95995
CDK5RAP1	3.44311	2.65024
PLA2G12B	3.79725	1.32838
TXNDC12	0.554304	1.10954
NNT	0.100338	0.273354
SYNJ2BP	0.632883	0.56024
CARS2	0.272625	0.789324
MTRES1	-0.596981	2.1239
EEF1G	0.875987	1.74187
NDUFA8	0.569084	1.05944
H2AC20	1.35627	0.368578
CASP14	0.625028	0.359319
SUCLG1	-0.39465	1.56716
STT3A	0.494364	1.41703
DNAJB11	0.988189	2.61872
RAB10	0.981783	2.57597
CNBP	0.240704	0.387865
DIABLO	0.0534554	0.0702156
GTPBP6	1.04226	0.970273
HADH	0.822197	0.5462
MRPL21	1.63463	2.46802
LAMP2	-0.609613	0.565441
LAP3	0.90328	1.77452
H2AZ2	1.08738	0.384072
NDUFA5	1.63005	2.47261
ATP5PB	0.335076	0.717054
APEX1	0.108201	0.101307
ATAD1	0.678782	1.15377
RPL13	0.873699	2.06051
CPT2	0.0555139	0.0210095
SDHB	-0.474894	0.883516
HCCS	0.625057	0.355773
GTPBP3	1.56759	3.39791
RAB1A	0.458261	0.617229
GLRX5	0.490361	0.764139
AGPS	1.2602	0.823245
NME1	1.61849	3.18324
AARS2	2.09796	5.00758
HBE1	0.0207248	0.0373267
IGKV2-29	-0.0205259	0.147055
RPLP0	0.610785	1.04708
GNAT3	0.609147	0.958339
HSP90B1	0.33533	0.897294
PUS1	-0.192046	0.203715
SAFB	0.0682263	0.219752
RPL12	0.565022	0.741817
HACD3	1.07469	2.03687
ATP5MG	0.34404	0.562474
PDIA5	-0.273372	0.405555
PYCR2	1.16349	2.83727
EWSR1	0.399468	0.287112
MRPL53	2.00525	1.49347
EARS2	1.24315	1.85162
LMAN1	0.75543	1.34047
CCT7	0.32846	0.424558
HNRNPA3	0.709095	1.85258
NDUFS1	1.2778	4.97633
GTPBP8	-1.84301	0.603189
YARS2	1.27632	2.85032
IGHMBP2	-0.712049	0.768166
COX7A2	-0.281425	1.01655
CISD1	-0.00508308	0.00264555
DDX21	-0.316116	0.273208
DDX3X	0.617753	1.8372
PAK4	-0.573377	1.05878
RPSA	0.662275	2.08596
SMIM4	1.48519	1.30448
PTPN1	1.02894	3.4844
RBFA	0.41056	0.459884
MAGT1	1.17128	1.71934
RPS27L	0.354724	1.83863
PDIA4	0.0522847	0.0802297
HMGB3	0.783597	3.34614
H2BC21	0.987391	0.375545
FASTKD5	1.7013	2.28126
MIF	0.242837	0.634058
KRAS	-0.19587	0.638957
HMGB2	0.543211	1.39208
METTL17	0.318108	1.67029
HK1	-0.000243187	0.00042481
COX16	-0.403268	0.490622
CCT4	0.374484	0.502095
SLC25A6	0.28564	0.21773
SSBP1	0.852876	3.01229
HMGN3	0.0270784	0.017682
VIM	-0.798431	0.810875
IBA57	0.537111	1.64284
RPL14	0.860966	0.616393
HSP90AA1	0.145919	0.107653
RPS21	0.325573	0.883292
COA5	-0.205915	0.643852
NDUFA4	-0.107775	0.182192
TMX1	0.40589	1.18989
CMC1	-1.09225	0.928321
VCP	0.100014	0.0467734
MLEC	1.74684	2.52535
SLC1A5	0.586538	1.19664
ANXA2P2	0.53589	1.00235
OPA1	-0.34056	0.121827
MRPS22	1.96257	3.40607
NADK2	0.570604	1.43285
MRPL34	-0.0422213	0.0180227
ECI2	0.873141	1.89131
SNRPD3	0.626809	2.30782
POLDIP2	1.83833	3.48749
TMLHE	2.26039	1.77194
LYRM7	2.40177	2.44321
RPS19	0.420039	0.736944
G3BP1	0.442277	1.07244
HDHD5	1.17346	4.06465
SRPRB	0.660584	0.482144
ALDH3A2	1.23555	2.28989
DDOST	0.735272	1.65322
MRPL49	2.56056	2.36573
HNRNPA0	-0.250629	0.089906
SELENOH	0.843729	2.33062
MANF	-0.19184	0.427607
SEC61A1	0.882603	2.33803
EIF5AL1	-0.00499821	0.00738406
TOMM5	0.313916	0.252269
KRT14	0.630586	1.05192
MRPL33	0.124881	0.0910226
CLPB	1.10621	1.08669
MAP4K4	1.19081	0.395195
COQ8A	-0.521287	0.613291
PDHA1	0.528485	1.47392
LUC7L	1.58974	1.81974
CCDC134	0.128276	0.0890272
CTTN	-0.464077	0.23748
ABCD3	1.12877	1.40197
TIMM29	0.187688	0.254142
RPS10	0.383697	1.74625
MACROD1	-0.808466	2.81682
COX7C	-0.326642	0.929839
RPL6	0.0615542	0.0336964
LAMP1	-0.901619	0.432742
DLST	0.706837	0.493915
CENPV	-1.25993	1.40978
API5	0.955533	1.25223
CS	0.433413	0.776998
AK2	1.0079	1.15312
AIFM1	-0.0491748	0.096825
MRPS6	1.43371	2.66082
RPL35	1.33557	0.855182
SRSF7	0.701395	1.17591
RPS20	0.281773	0.683147
NOMO2	1.46101	1.81533
RPS29	0.788415	1.7122
ATP5PF	-0.0146155	0.0121208
RBM14	0.617558	1.0347
TIMM44	0.35439	2.37192
ANKS6	0.0236664	0.0986685
FPGS	1.30179	1.12037
ALDH6A1	-0.166505	0.103516
POLDIP3	1.74182	1.91783
RAB11A	1.08707	1.8414
MRPL48	0.0246673	0.0317676
IGKV2D-24	-0.067028	0.475768
HYOU1	0.433356	1.49063
IGHG2	-0.0335593	0.330362
HPR	0.354788	0.701152
TRMT10C	0.20342	0.577099
LBR	0.553433	0.901454
MRPL55	0.177439	0.382105
SNRPD1	0.127756	0.157442
CISD3	0.252018	0.331593
SNRPD2	0.790425	0.703751
RPS13	0.123089	0.32634
ESYT1	0.370369	0.830608
EIF1	0.130103	0.0684169
RBMX	0.486015	0.999903
SHMT2	0.46662	0.992432
UBA52	0.781642	0.896243
NT5DC2	1.81302	5.3147
NACA	-0.0417514	0.0630696
TOMM6	0.372379	0.477769
MT-CO2	-0.266946	1.43299
EMD	0.500671	0.447502
TUFM	1.41083	4.64898
RAB5C	0.977911	1.75556
DNAJC8	-1.11456	1.09846
UQCRB	0.397198	0.57781
FKBP8	0.691738	1.23366
TOMM22	0.253227	0.512876
PYCR1	0.994126	3.22184
CBLN1	-0.121006	0.610844
KRT10	0.939839	0.954977
UPF3B	0.67208	1.04959
KRT1	0.654598	1.03812
RPL4	1.72755	1.93532
LRIG2	-0.0332088	0.0646112
TCP1	0.0609312	0.184861
ALDH18A1	0.260807	0.407055
PNPT1	1.22203	2.04438
MTDH	0.467946	1.02944
RPS18	1.08134	0.971549
AFG3L2	1.28199	3.19111
POR	1.20793	1.86457
GLUD1	0.909182	2.37073
CP	-0.0132284	0.0320082
MRPS17	1.8429	2.97713
SMC4	-0.0381865	0.0917227
COL4A6	-1.40849	0.715537
C3	-0.00634623	0.0138877
VARS2	2.12464	3.65958
TMED10	0.885052	2.7087
KPRP	0.416143	0.341248
LRRC59	0.601046	1.86895
NIPSNAP2	0.0477982	0.0407368
SPCS3	0.809248	1.43282
CDC42EP1	-0.0665317	0.0815138
RPS6	0.73096	1.47264
OCIAD1	1.02862	1.21679
MRPL38	0.358034	0.876944
DARS2	1.53537	4.00453
PRDX6	0.809417	0.43969
SNAPC4	0.422677	0.636855
IVD	0.884512	1.72845
HMGN2	-0.908726	1.42494
COX5B	0.0775685	0.128344
GUF1	-0.908973	0.461976
GANAB	0.305328	0.75086
NDUFC2	-0.638472	0.306574
MRPL1	0.949783	0.910333
NDUFV1	1.1097	1.52926
PPP6R2	-0.0485454	0.044959
LMNB1	2.06644	1.79278
SSR4	0.849957	0.455703
SCO2	0.248429	0.379115
ATP1B3	0.677409	0.841008
SLC7A5	0.326808	0.202856
RHOT2	0.241253	0.377909
RPL23	1.04277	2.43207
MRPL58	-0.363616	1.41136
UQCRFS1	0.157	0.768483
NDUFS6	-0.11287	0.215345
GRSF1	1.44577	2.28926
RPN2	0.543271	1.60798
ARF6	-1.25916	0.671813
P4HB	0.209701	0.249
PSIP1	1.23486	0.950219
ABCB7	1.16405	2.47467
PHB2	0.850459	1.36205
IARS2	0.531604	1.26539
VDAC2	0.114576	0.150397
ATP5MF	0.215268	0.162815
LETM1	1.18127	2.85347
SERBP1	0.826625	2.40266
MRRF	-0.620802	1.65873
PRDX5	0.957978	1.36393
MDH2	0.637694	1.52834
SLC25A5	0.207395	0.270569
HSP90AB1	0.0717444	0.0941179
CCDC47	1.2329	1.85413
PKN2	-0.357296	0.411871
TIMM8A	1.18395	2.30436
ATP1A1	0.697868	1.30382
METTL15	0.369889	0.23375
MRPL3	1.66584	2.82458
NDUFB11	0.834606	1.11917
CROCC2	-0.0259566	0.22812
NDUFA10	0.772993	2.1878
DSG1	1.73862	1.12441
RPL19	0.763966	1.38131
SARS2	1.0083	2.83833
GFM1	0.950183	2.18739
RAP1B	0.299583	0.436762
CIRBP	0.227057	0.103883
NDUFAB1	1.21478	2.16583
CPVL	0.362247	0.423467
GNB1	0.282211	0.246683
RPS11	0.741843	1.16995
COX5A	0.139662	0.255829
MARCKSL1	-0.509336	1.48793
AMIGO2	0.0663695	0.140119
CFL1	0.562706	0.41388
PDF	-0.269554	0.656542
TRAP1	1.25318	3.40849
HSPE1	0.771161	2.03221
PPA2	0.393404	1.12707
TBXAS1	-0.0136287	0.0137324
ATP5PD	-0.098794	0.0562073
SLC25A12	0.526614	1.81309
IDH3B	0.31921	0.681779
SEMG2	1.51968	0.703398
VMA21	0.305066	0.622415
GRPEL2	0.679618	3.08393
MSN	-0.282788	0.841539
EIF1AX	0.200074	0.732897
RCN2	1.2838	3.0687
SEC62	0.437591	2.15003
HSD17B4	0.46177	0.317076
MTIF2	0.24502	0.475343
LRPPRC	0.115574	0.234264
HMGN1	-1.13501	3.24776
VDAC1	0.481643	0.824101
HNRNPH1	1.95125	2.30764
CCT8	0.968602	0.726762
PRDX3	-0.0575271	0.179024
RPL31	0.459585	0.527892
FAM162A	0.23662	0.295159
PARP1	0.910019	0.780941
MIPEP	1.2174	2.99058
C1QB	-0.0266495	0.0892237
SLC3A2	0.435604	0.84044
ACSF3	0.448134	3.41207
LRPAP1	-1.59292	0.720614
TUBA1A	0.193365	0.263206
EZR	-0.149697	0.274786
HSPA8	0.970272	1.28022
MT-ATP8	0.262	0.359154
CNP	0.0577822	0.3147
FECH	0.974185	0.999168
RPL9;RPL9P7;RPL9P8;RPL9P9	0.178286	1.02833
A2M	0.00845098	0.0200677
HMGA1	-0.757023	0.823503
BRCC3	0.116225	0.533325
S100A9	0.803799	0.507532
MCUR1	0.798823	1.19331
RPL18	-0.00152922	0.00276614
MTIF3	-0.517679	1.3456
MRM2	-0.108626	0.211197
EEF1A1	0.275988	0.655343
MRPL16	-0.0901546	0.211138
NDUFS2	1.59734	3.44619
CD59	0.904693	0.77092
HAX1	2.25174	1.6985
ACTB	1.36471	1.32432
HNRNPU	0.752864	0.99335
MCCC2	0.478596	0.753278
SEC61B	0.0570588	0.348916
DLC1	-0.0134249	0.0113709
SUB1	1.03586	1.6991
SPTAN1	0.301362	0.0742897
RAB7A	2.23602	1.09814
RPS7	0.327867	1.31446
GSTK1	0.00696755	0.00883754
ILVBL	0.896447	1.51171
RAC3	0.788796	0.430068
TF	0.152557	0.668132
MAIP1	1.26783	1.54226
MAZ	0.674044	0.229648
PHB1	0.742878	1.1631
NDUFS3	1.80482	3.85617
SLC25A1	-0.168446	0.390143
POU3F1	-0.00668192	0.005431
SDHA	0.0995612	0.2293
MRPL12	2.14445	3.31374
RPS3	0.299888	0.77138
SSR1	0.514201	1.66367
MESD	-0.275518	0.412924
HIGD1A	0.146095	0.152899
FUS	0.409593	0.930729
CCDC124	0.313735	0.383019
PMPCA	1.41409	2.82768
MTPAP	0.95957	0.890915
HADHA	1.64905	3.48967
CFAP57	-0.0557461	0.35673
MRPS7	1.76179	3.75884
TMPO	0.340295	1.08581
MGST3	0.46773	1.07242
UQCRC2	0.635857	1.12304
MT-CO3	-0.534907	1.75121
LTBP1	-0.649	0.117376
HSPA5	0.428853	1.90558
TMED9	0.785872	1.59229
MRPS26	1.57609	3.00628
DAD1	0.470828	0.927211
HNRNPC	0.318823	0.164824
ALDH5A1	2.06776	4.39373
TIMM10	-0.00232243	0.00246014
MTHFD1L	0.989657	2.65126
GLS	0.334222	0.584931
TMED3	0.749261	1.05438
TXNDC5	0.163497	0.579115
RPL11	0.647426	1.11075
RPS23	0.674343	2.06327
MATR3	-0.807821	0.432647
MRPS28	1.69264	2.84636
PGRMC1	0.719759	1.89524
FAF2	0.83281	0.774359
TIMM9	-0.0981956	0.177147
RPL38	0.784719	2.14649
HNRNPA2B1	0.251225	0.443305
	0.364046	0.587641
PTCD3	0.562958	2.84771
CCDC51	0.467291	0.508673
ECH1	0.58253	1.69281
BCS1L	0.0623221	0.578025
FAM136A	1.54729	2.33152
DHX30	2.0226	4.04697
UQCRQ	0.61622	0.89937
RPL27	1.61661	1.50633
ACADVL	0.141029	0.0813487
ALDH2	0.703499	1.87414
CHID1	-0.927588	0.795211
TOMM70	0.737277	0.695886
RPL7A	0.590482	1.21932
LMNB2	0.952577	0.978295
ATP2A2	0.804989	1.3133
RCC2	-0.110972	0.221312
CMC2	-0.740202	1.50952
RAB21	1.37139	1.96062
SEPTIN2	0.409585	0.722045
PDIA3	0.0776711	0.191831
BANF1	-0.0398035	0.0157207
TFAM	-0.103656	0.129934
HNRNPH3	0.618237	0.336822
H4C1;H4C11;H4C12;H4C13;H4C14;H4C15;H4C16;H4C2;H4C3;H4C4;H4C5;H4C6;H4C8;H4C9	1.10439	0.364793
HNRNPK	0.574737	1.20195
MCAT	1.10095	3.05622
FAU	0.216918	2.12892
NDUFAF3	-0.319375	1.42565
KHDRBS1	1.12275	1.01905
NOLC1	0.486155	0.785305
RPL30	0.785049	1.06289
SNRPB	0.819108	3.23329
ATP5F1EP2	0.0167661	0.0243619
PET100	0.198258	0.474952
UQCRH	0.434321	0.685826
MRPL45	0.713537	1.77627
C1QBP	0.979403	2.54453
COX4I1	0.284338	0.59157
SFPQ	1.3428	1.68285
MRPL39	1.25103	1.69248
NDUFAF4	1.01979	2.75932
TRABD	0.568053	0.374086
MICU1	-0.29976	0.55396
MRPL15	1.50629	2.18793
ACAT1	0.264814	0.412198
TIMM13	1.21888	1.71153
DDX17	1.27997	0.748248
ASNS	0.135418	0.200228
PRDX4	0.279623	0.806116
TIMMDC1	-0.134949	0.11044
RPL22	0.275795	1.17298
GTF2I	0.184775	1.40574
RHOC	-0.949315	0.361646
BCAP31	0.358071	0.701204
ATP5F1A	0.115246	0.18783
ATP5F1B	0.010108	0.014538
NDUFA13	1.43268	0.510756
H3C1;H3C10;H3C11;H3C12;H3C2;H3C3;H3C4;H3C6;H3C7;H3C8	0.912396	0.256896
NDUFS5	0.0651326	0.045069
CANX	0.587482	1.84423
BCKDK	0.338131	0.452685
RPN1	0.589167	1.70037
VRK1	0.0401564	0.11095
HNRNPL	1.31791	0.7388
EXPH5	-0.125355	0.103228
CLIC2	0.0664711	0.179365
ERO1A	0.944585	1.20771
ETFB	0.566514	1.54969
MRPS30	1.02094	1.75984
BAK1	0.446146	0.83858
HSPA1B	0.298072	0.224131
COX6C	-0.150371	0.401576
ALYREF	1.54983	1.97245
MRPS25	1.67848	3.94348
IRS4	0.94845	0.730208
RSAD1	1.94252	2.2821
RPUSD3	0.835557	1.56908
EDF1	0.345653	0.386646
HSD17B10	0.924955	2.55987
H1-4	0.687977	0.462141
RCC1L	0.0141301	0.0323397
SPCS2	0.716963	0.572425
CCT2	-1.13297	0.848307
RAB2B	2.0044	0.985189
CALM1	-1.05965	0.300166
COX6A1	0.385072	0.0799411
TOMM20	0.24192	0.256234
RPL5	-0.0348425	0.0329046
PTP4A2	-1.92495	1.47449
ETFA	0.953282	2.06961
H1-2	0.798406	0.542643
SACM1L	-0.4949	0.226434
RPS4X	0.819571	2.90792
SLC25A13	0.372253	0.41324
CLPX	1.39469	3.31247
ACADM	0.470094	0.522029
LUC7L3	1.07831	1.85622
FOXRED1	1.01091	0.361037
MGME1	0.680213	1.27822
RPS14	0.497979	1.50536
NSUN4	0.247406	0.316784
ACTA1	2.97137	1.20442
U2AF2	1.93948	1.39266
CCT6A	-1.05587	0.325395
SFXN1	0.365447	0.664183
RBM39	2.0544	1.3817
RPS25	0.564791	1.8544
ATAD3B	1.02337	0.22048
MMAB	0.313741	1.39012
RPL24	0.329162	0.486586
MRM3	2.74985	1.7484
DLAT	-0.759606	0.318526
IDH2	1.03472	0.956074
RTN3	0.57801	2.32032
CHMP2B	-0.727092	0.817714
OXA1L	0.586021	1.3687
PTBP1	0.660006	0.300347
MRPL18	1.44289	2.39346
HMGB1	0.962426	2.32013
NCL	0.551994	0.92705
TIMM23	1.98695	1.07655
MTCH2	0.644378	0.962226
FLNB	0.458265	0.406415
ATP5F1C	0.372098	0.934992
PTGFRN	0.751923	1.44961
SEPTIN11	0.328988	0.211239
EEF2	0.416522	0.41461
DST	-0.0104136	0.0285951
IDH3G	1.60613	0.595329
RPS2	0.841682	3.9299
MYL6	0.595003	0.359099
FKBP3	-0.266487	0.524051
PDE2A	-0.120634	0.0727737
RPS3A	0.770893	1.33595
TARS2	1.66765	4.72604
GTPBP10	2.03021	3.14752
HNRNPD	1.02607	1.02467
TIMM50	1.02875	0.936646
PRDX1	0.435606	0.823007
PDHB	0.683381	0.838752
HADHB	1.29504	2.85607
RPS5	0.507097	0.709027
SRSF1	0.672838	0.70116
ISCU	-0.121559	0.634663
NDUFA6	1.73551	3.8276
UQCR10	0.553251	1.2092
MRPL40	0.198719	0.361581
SERF2	0.462311	0.252067
TAMM41	1.02621	2.21689
TACO1	-0.79003	1.83233
CLPP	1.65108	1.55648
GLDC	1.66276	2.77454
VDAC3	0.547668	0.834087
NCLN	0.646591	0.543133
MRPS2	1.6467	2.2985
UQCRC1	0.624806	0.486959
CHCHD2	0.903494	0.756952
ATP5IF1	-1.47896	2.13677
MRPL10	1.72116	3.1161
ATP5PO	0.270569	0.506345
C4A	-0.136106	0.606992
NPM1	0.796191	1.16596
CLTC	-0.164292	0.243909
PDE12	2.53695	1.27125
MRPL13	2.01526	1.83284
IGKV2-24	0.0662498	0.16665
MRPL22	1.61615	1.29297
DCD	1.1494	1.05736
MRPS31	1.90383	3.03252
CKMT1A;CKMT1B	2.00938	2.45889
PTRH2	1.53581	1.03116
ACAD9	1.65604	3.42402
SRSF3	1.08589	0.759717
RPL15	1.78434	1.83254
NDUFB6	0.0993149	0.128629
MRPS11	0.835013	2.06182
ATP5MK	-0.021554	0.0121458
MRPL41	1.15946	2.76932
SLIRP	0.102438	0.191243
NDUFB10	1.20159	1.42653
MYBBP1A	0.141386	0.63802
NFS1	1.46047	1.12614
RPL7	1.05093	0.539712
ATP5MJ	0.407857	0.410642
DDX5	0.155512	1.61089
SCP2	-0.0649467	0.0546436
GRPEL1	0.720866	2.57062
NFU1	0.920087	1.81745
SCO1	-0.496499	0.42158
RPL36AL	0.787805	2.0368
PLS3	2.61981	2.07909
SUCLA2	0.97838	1.746
NUDT21	1.86663	1.92515
HSPA9	1.69225	4.05004
COQ6	0.385908	0.841586
ENO1	-0.296973	0.257491
MRPL54	-0.492216	0.757166
TBRG4	1.10136	1.9473
NDUFS7	1.62851	3.78649
U2AF1	0.523908	1.86743
BTN2A3P	0.0759144	0.819199
PGAM5	1.0647	1.45847
CYC1	0.481777	0.916507
TXNDC8	0.221685	0.24288
RPL23A	-0.367492	0.104943
CYB5R3	1.25116	2.18121
HNRNPM	1.10259	1.01575
SDHC	-0.0328197	0.070254
PDIA6	0.0691562	0.125602
TCEANC2	0.260297	0.137729
RPS12	0.257044	0.659401
SPTBN1	1.51643	0.63463
TXN	0.382524	0.703161
CPOX	1.66173	2.41378
PDAP1	-0.585511	1.42029
CALU	-0.0918334	0.0474975
MRPL14	-0.0916858	0.165256
PTPN9	0.037796	0.120472
DNAJC10	0.286926	0.486174
BSG	0.476799	0.658467
HM13	1.46423	0.612017
FEN1	0.653873	1.19417
PITRM1	1.28393	4.12584
NUMA1	0.654569	0.476134
AGK	0.392213	0.665968
ATPAF1	2.05352	1.12618
PPIB	-0.0339999	0.0356699
PDK3	2.47685	1.97186
MRPS27	1.45759	3.11443
NIPSNAP1	-0.331468	0.746487
TMED7	0.707476	2.17915
TUBB	0.388373	0.71826
SLC25A11	0.410776	0.717277
ELAC2	1.72207	2.04054
TIMM8B	1.652	0.793098
DEK	0.678028	0.55058
RAN	0.248355	0.60761
UBAP2L	0.931352	2.41309
MRPL17	1.08043	2.70527
TUBB4B	0.236117	0.38623
CHCHD1	0.050971	0.125196
ACO2	1.46309	2.03308
PGRMC2	0.70465	2.18209
NDUFA9	0.546638	0.339845
MT-ATP6	0.305451	0.532909
MRPS18A	1.96736	2.84743
CPSF6	0.0731997	0.743832
HPX	-0.108825	0.37894
MARCHF5	0.289345	0.416787
CCT3	0.12792	0.301899
ACTG1	2.09413	1.05261
MRPL11	0.0155878	0.0396876
DHX9	0.455204	0.318661
MTHFD2	0.269945	0.510657
NONO	0.894042	0.405711
LARS2	0.919528	2.10336
MRPS18B	1.80552	2.73396
RPS15A	0.439205	0.989562
PMPCB	1.26595	3.15546
TFRC	-0.123688	0.106568
RPS17	0.424871	1.50276
CCT5	0.0585775	0.064177
UQCC2	2.3272	2.0073
PIN4	0.422677	0.827963
RACK1	0.719758	1.11722
XRN2	1.73778	1.35899
PRKCSH	-0.506525	0.386214
MRPS9	1.91303	4.20616
COIL	0.925488	2.27965
DDX28	1.21712	2.29084
MRPS16	1.27168	3.774
SND1	-0.224352	0.649309
MUC19	-0.0790906	0.189657
C1QA	0.0394411	0.176634
PCCA	1.0087	1.44429
CFAP210	-0.0445275	0.442902
SLC16A1	0.227567	0.460175
ATP5F1D	0.163642	0.25914
ABHD10	1.35143	4.31495
KRT9	0.801541	0.561975
PRDX2	0.143506	0.208462
ALDH1B1	0.992698	2.57268
MRPS12	0.74234	1.72577
YWHAQ	0.0921068	0.160511
GCAT	1.77863	1.38358
RCN1	0.400362	1.25348
RPLP2	0.920976	1.01302
DSTN	1.65455	1.01179
COA3	0.622405	0.576589
ATAD3A	0.16191	0.173218
MRPL46	0.221758	0.339864
TMEM258	0.323448	0.639344
CTSD	0.45535	0.875351
ATP5ME	0.359623	0.459235
PRORP	1.14924	2.1312
CKAP4	1.39615	1.50456
HNRNPA1	0.573973	2.33882
LONP1	1.27468	3.58517
MRPS34	1.38359	2.97273
FBL	1.17827	0.589539
RPS16	0.680421	1.28432
OAT	0.0990043	0.116219
COX6B1	-0.174353	1.68921
SLC25A3	0.242996	0.237844
ZDHHC17	0.856094	1.00642
CALR	0.0998101	0.204606
PLBD2	-0.981926	0.605913
SEC11A	0.39955	0.794015
TFB1M	0.573786	1.02265
RPS28	0.38323	0.94095
ACOT13	-0.427227	0.455401
IQGAP1	0.317073	0.681207
MRPL43	2.43452	2.19415
IDH3A	0.0750675	0.913648
RPL27A	0.766769	1.47557
EIF4H	-0.967231	0.813758
DLD	1.38425	3.22221
STOML2	0.478513	0.739415
ECSIT	0.203781	0.114598
RBM3	0.066112	0.0648474
TOMM40	0.25489	0.162108
IMMT	0.751849	0.281454
MRPL37	1.95162	3.46266
MRPL47	1.99751	2.55459
CYCS	0.00391245	0.00412502
TOP1	0.814409	0.766871
IPO5	0.357963	0.193555
ECHS1	0.459641	1.56621
CSRP2	-0.500156	0.527765
MRPL24	0.838054	1.55085
